# Supplementary material
Source: PubMed Central journal article supplement (PMC8092037)
Supplement: BLT-19-205_Online_supplementary_content.pdf [file BLT-19-205_Online_supplementary_content.pdf]

**ONLINE SUPPLEMENTARY CONTENT**

**Table S1 - List of Structure Measures**

| Structure Components                                                                                                     | Structure Drivers                                                                                                                   | Structure Measures                                                                                                                          |                                                                                                                               |
|--------------------------------------------------------------------------------------------------------------------------|-------------------------------------------------------------------------------------------------------------------------------------|---------------------------------------------------------------------------------------------------------------------------------------------|-------------------------------------------------------------------------------------------------------------------------------|
| <b>Organization &amp; Governance</b>                                                                                     | PBM Workgroup                                                                                                                       | 1 There is a PBM Workgroup (PBM WG) with a specific mandate to seek for PBM development                                                     |                                                                                                                               |
|                                                                                                                          |                                                                                                                                     | 2 The PBM WG is multi-professional                                                                                                          |                                                                                                                               |
|                                                                                                                          |                                                                                                                                     | 3 There is a PBM Champion/s recognized by the organization                                                                                  |                                                                                                                               |
|                                                                                                                          |                                                                                                                                     | 4 The PBM WG is officially authorized by hospital management                                                                                |                                                                                                                               |
|                                                                                                                          |                                                                                                                                     | 5 There is a decision-making process in place. PBM WG recommendations are applicable to the organization                                    |                                                                                                                               |
|                                                                                                                          |                                                                                                                                     | 6 The PBM WG adopts existing national and/or international guidelines and standards to set the local recommendations and clinical protocols |                                                                                                                               |
|                                                                                                                          |                                                                                                                                     | 7 The performance of the PBM WG is periodically assessed                                                                                    |                                                                                                                               |
|                                                                                                                          |                                                                                                                                     | 8 The PBM WG has dedicated time freed up                                                                                                    |                                                                                                                               |
|                                                                                                                          |                                                                                                                                     | 9 The PBM WG has budget resource allocation                                                                                                 |                                                                                                                               |
|                                                                                                                          | Clinical Protocols                                                                                                                  | Pillar 1. Optimising red cell mass                                                                                                          | 10 There is a Preoperative anaemia management protocol in place, and it is in line with the national guidelines and standards |
|                                                                                                                          |                                                                                                                                     |                                                                                                                                             | 11 The Preoperative anaemia management protocol is recent/updated                                                             |
|                                                                                                                          |                                                                                                                                     |                                                                                                                                             | 12 The Preoperative anaemia management protocol is publicly recognized by the organization                                    |
|                                                                                                                          |                                                                                                                                     |                                                                                                                                             | 13 Required FTEs are allocated to support the execution of the protocol                                                       |
|                                                                                                                          |                                                                                                                                     |                                                                                                                                             | 14 Required logistics and patient accessibility is granted to support the execution of the protocol                           |
|                                                                                                                          |                                                                                                                                     | Pillar 2. Minimising blood loss and bleeding                                                                                                | 15 Required biomarkers and therapies are funded to support the execution of the protocol                                      |
|                                                                                                                          |                                                                                                                                     |                                                                                                                                             | 16 There is a Tranexamic protocol in place, and it is in line with the national guidelines and standards                      |
|                                                                                                                          |                                                                                                                                     |                                                                                                                                             | 17 The Tranexamic protocol is recent/updated                                                                                  |
|                                                                                                                          |                                                                                                                                     |                                                                                                                                             | 18 The Tranexamic protocol is publicly recognized by the organization                                                         |
|                                                                                                                          |                                                                                                                                     |                                                                                                                                             | 19 There is an autotransfusion (predonation) protocol for high bleeding procedures (Escoliosis, review hip replacement etc.)  |
|                                                                                                                          |                                                                                                                                     |                                                                                                                                             | 20 The Autotransfusion protocol is recent/updated                                                                             |
|                                                                                                                          |                                                                                                                                     |                                                                                                                                             | 21 Required logistics and patient accessibility is granted to support the execution of the Autotransfusion protocol           |
|                                                                                                                          |                                                                                                                                     |                                                                                                                                             | 22 There is an Intra-operative autotransfusion protocol (Cell saver)                                                          |
|                                                                                                                          |                                                                                                                                     |                                                                                                                                             | 23 The Intra-operative autotransfusion protocol is recent/updated                                                             |
|                                                                                                                          |                                                                                                                                     |                                                                                                                                             | 24 The Intra-operative protocol is publicly recognized by the organization                                                    |
|                                                                                                                          | Pillar 3. Optimising the physiological reserve of anaemia                                                                           | 25 There is a Post-operative autotransfusion protocol (Recuperadores de drenaje)                                                            |                                                                                                                               |
|                                                                                                                          |                                                                                                                                     | 26 The Post-operative autotransfusion protocol is recent/updated                                                                            |                                                                                                                               |
|                                                                                                                          |                                                                                                                                     | 27 The Post-operative autotransfusion protocol is publicly recognized by the organization                                                   |                                                                                                                               |
|                                                                                                                          |                                                                                                                                     | 28 There is a Transfusion thresholds protocol in place, and it is in line with the national guidelines and standards                        |                                                                                                                               |
|                                                                                                                          |                                                                                                                                     | 29 The Transfusion thresholds protocol is recent/updated                                                                                    |                                                                                                                               |
|                                                                                                                          |                                                                                                                                     | 30 The Transfusion thresholds protocol is publicly recognized by the organization                                                           |                                                                                                                               |
| <b>Professionals &amp; Training</b>                                                                                      | Healthcare professionals' knowledge (hospital internal survey)                                                                      | 31 Do you know if there is a PBM program in your hospital?                                                                                  |                                                                                                                               |
|                                                                                                                          |                                                                                                                                     | 32 Do you consider alternatives to avoid/minimize transfusion in your daily practice with your patients?                                    |                                                                                                                               |
|                                                                                                                          |                                                                                                                                     | 33 Are you familiar with the preoperative anaemia management protocol of your hospital?                                                     |                                                                                                                               |
|                                                                                                                          |                                                                                                                                     | 34 Are you familiar with any blood loss minimization protocol of your hospital (i.e. us of antifibrinolytics)                               |                                                                                                                               |
|                                                                                                                          |                                                                                                                                     | 35 Are you familiar with the transfusion protocol (transfusion thresholds) of your hospital?                                                |                                                                                                                               |
|                                                                                                                          |                                                                                                                                     | 36 Do you consider any other factors than Hb levels for transfusion decision?                                                               |                                                                                                                               |
|                                                                                                                          | PBM educational programs for clinicians                                                                                             | 37 Do you regularly receive (or have access to) useful information of your transfusion related clinical practice?                           |                                                                                                                               |
|                                                                                                                          |                                                                                                                                     | 38 PBM learning courses and/or clinical sessions are regularly offered to specialists involved in transfusion risk Surgery processes        |                                                                                                                               |
|                                                                                                                          |                                                                                                                                     | 39 PBM learning courses and/or clinical sessions are regularly offered to specialists involved in transfusion risk Medical processes        |                                                                                                                               |
|                                                                                                                          |                                                                                                                                     | 40 PBM learning courses and/or clinical sessions are offered to residents                                                                   |                                                                                                                               |
|                                                                                                                          |                                                                                                                                     | 41 PBM learning courses and/or clinical sessions are offered to nurses                                                                      |                                                                                                                               |
|                                                                                                                          |                                                                                                                                     | 42 PBM learning courses and/or clinical sessions are offered to GPs                                                                         |                                                                                                                               |
|                                                                                                                          |                                                                                                                                     | 43 PBM learnings provide credits and certificates are issued                                                                                |                                                                                                                               |
|                                                                                                                          |                                                                                                                                     | 44 There is a continuous learning system in place with an educational program, attendance registry and individual learning history record   |                                                                                                                               |
|                                                                                                                          | PBM educational programs for patients                                                                                               | 45 ID/IDA patients scheduled for surgery receive PBM information                                                                            |                                                                                                                               |
| 46 Informational material is made available to patients and patients associations concerning alternatives to transfusion |                                                                                                                                     |                                                                                                                                             |                                                                                                                               |
| <b>Information Systems</b>                                                                                               | PBM related computerized physician order entry (CPOE) systems                                                                       | 47 There is a PBM/alternatives to transfusion information consent form                                                                      |                                                                                                                               |
|                                                                                                                          |                                                                                                                                     | 48 Patient transfusion history records are accessible in the patient clinical history                                                       |                                                                                                                               |
|                                                                                                                          |                                                                                                                                     | 49 CPOE includes a transfusion risk estimation model                                                                                        |                                                                                                                               |
|                                                                                                                          | Reporting capabilities                                                                                                              | Surveillance and monitoring                                                                                                                 | 50 CPOE supports clinical decision for prescribing transfusion and alternatives                                               |
|                                                                                                                          |                                                                                                                                     |                                                                                                                                             | 51 Automates follow-up of the appropriateness of RBC orders vs recommendations and clinical protocols                         |
|                                                                                                                          |                                                                                                                                     | Patient-level KPIs (with possibility to compare baseline)                                                                                   | 52 Transfusion rate                                                                                                           |
|                                                                                                                          |                                                                                                                                     |                                                                                                                                             | 53 Transfusion index                                                                                                          |
|                                                                                                                          |                                                                                                                                     |                                                                                                                                             | 54 Use of single unit                                                                                                         |
|                                                                                                                          |                                                                                                                                     |                                                                                                                                             | 55 Use of pharmacological agents (i.e. quantity and doses of i.v. iron, erythropoietic agents, factor concentrates etc.)      |
|                                                                                                                          |                                                                                                                                     |                                                                                                                                             | 56 Use of cell salvage                                                                                                        |
|                                                                                                                          |                                                                                                                                     |                                                                                                                                             | 57 Use of point of care (POC) coagulation testing                                                                             |
|                                                                                                                          |                                                                                                                                     |                                                                                                                                             | 58 Haemoglobin concentration/haematocrit at hospital admission                                                                |
|                                                                                                                          |                                                                                                                                     |                                                                                                                                             | 59 Haemoglobin/haematocrit at hospital discharge                                                                              |
|                                                                                                                          |                                                                                                                                     |                                                                                                                                             | 60 Transfusion related consumables and overhead                                                                               |
| Activity Based consumptions                                                                                              | 61 PBM related consumables (pharmacological agents) and overhead                                                                    |                                                                                                                                             |                                                                                                                               |
|                                                                                                                          | 62 In hospital mortality per clinical process, with the possibility to differentiate between transfused and non-transfused          |                                                                                                                                             |                                                                                                                               |
| Patient-level outcomes                                                                                                   | 63 LOS per clinical process, with the possibility to differentiate between transfused and non-transfused                            |                                                                                                                                             |                                                                                                                               |
|                                                                                                                          | 64 Readmission per clinical process, with the possibility to differentiate between transfused and non-transfused                    |                                                                                                                                             |                                                                                                                               |
|                                                                                                                          | 65 Infections per clinical process, with the possibility to differentiate between transfused and non-transfused                     |                                                                                                                                             |                                                                                                                               |
|                                                                                                                          | 66 MACE and cerebrovascular event per clinical process, with the possibility to differentiate between transfused and non-transfused |                                                                                                                                             |                                                                                                                               |
| Use of Informatio                                                                                                        | 67 Surveillance, monitoring and audit on adherence to protocols are periodically performed                                          |                                                                                                                                             |                                                                                                                               |
|                                                                                                                          | 68 Consumptions, outcomes and KPIs are periodically assessed                                                                        |                                                                                                                                             |                                                                                                                               |
|                                                                                                                          | 69 Results are made available to all involved professionals                                                                         |                                                                                                                                             |                                                                                                                               |
|                                                                                                                          | 70 Incentives schemes are set vs defined objectives                                                                                 |                                                                                                                                             |                                                                                                                               |

Table SII - Definitions of Process and Outcomes KPIs

| Dimension | Driver                                                    | KPI | Numerator                                                                         | Denominator                                                                                                                                       | Clinical procedures in scope                                                                                       |                              |
|-----------|-----------------------------------------------------------|-----|-----------------------------------------------------------------------------------|---------------------------------------------------------------------------------------------------------------------------------------------------|--------------------------------------------------------------------------------------------------------------------|------------------------------|
| Process   | Pillar 1. Preoperative Anaemia management                 | 1   | % of patients with a Hb determination 21-90 days before surgery (1)               | Patients with a Hb determination between 21-90 days before surgery (1)                                                                            | All patients                                                                                                       | TKR, THR, CRC, CAV           |
|           |                                                           | 2   | % of patients with an iron metabolism determination 21-90 days before surgery (1) | Patients with a Ferritin determination 21-90 days before surgery (1)(2)                                                                           | All patients                                                                                                       | TKR, THR, CRC, CAV           |
|           |                                                           | 3   | % of patients treated preoperatively 7-90 days before surgery                     | Patients who are anaemic and have an administration of intravenous iron (FeIV) and/or erythropoietin (EPO) between 90-7 days prior surgery (3)(4) | Anaemic patients between 90-7 days before surgery (4)                                                              | TKR, THR, CRC, CAV           |
|           |                                                           | 4   | % of patients with anaemia prior to surgery                                       | Patients who are anaemic as per the last Hb determination between 90 days and 1 hour before surgery (4)                                           | Patients with a Hb determination between 90 days and 1 hour before to surgery                                      | TKR, THR, CRC, CAV           |
|           |                                                           | 5   | % of patients treated with IV iron during hospital stay                           | Patients with a prescription of FeIV during hospital stay                                                                                         | All patients                                                                                                       | TKR, THR, CRC, CAV, HIF, GIB |
|           |                                                           | 6   | % of patients with preoperative transfusion                                       | Patients with a red blood cell transfusion between 21 days and 1 hour before surgery                                                              | All patients                                                                                                       | TKR, THR, CRC, CAV           |
|           | Pillar 2. Minimising blood loss and bleeding              | 7   | % of patients under spinal anaesthesia                                            | Patients with spinal anaesthesia                                                                                                                  | Patients with informed field                                                                                       | TKR, THR, HIF                |
|           |                                                           | 8   | % of patients treated with antifibrinolytics perioperatively                      | Patients with an administration of antifibrinolytics                                                                                              | Patients with informed field                                                                                       | TKR, THR, CRC, CAV           |
|           |                                                           | 9   | % of patients with blood recovery systems perioperatively                         | Patients for whom blood recovery system was used                                                                                                  | Patients with informed field                                                                                       | TKR, THR, CRC, CAV           |
|           | Pillar 3. Optimising the physiological reserve of anaemia | 10  | Hb level prior to transfusion                                                     | Sum of latest Hb value prior transfusion for patients transfused between 1 hour after surgery and discharge                                       | Patients transfused between 1 hour after surgery and discharge and with a Hb determination 1 day prior transfusion | TKR, THR, CRC, CAV, HIF, GIB |
|           |                                                           | 11  | % of patients transfused with Hb >= 8 g/dl                                        | Patients transfused between 1 hour after surgery and discharge and with latest Hb value prior transfusion >= 8 g/dl                               | Patients transfused between 1 hour after surgery and discharge and with a Hb determination 1 day prior transfusion | TKR, THR, CRC, CAV, HIF, GIB |
|           |                                                           | 12  | % of single-unit transfused patients                                              | Single-unit transfusion events                                                                                                                    | Total of transfusion events between 1 day after surgery and discharge                                              | TKR, THR, CRC, CAV, HIF, GIB |
| Outcomes  | Intermediate Outcomes                                     | 1   | Transfusion Rate                                                                  | Patients with a red blood cell transfusion during hospital stay                                                                                   | All patients                                                                                                       | TKR, THR, CRC, CAV, HIF, GIB |
|           |                                                           | 2   | Transfusion Index                                                                 | Total of red blood cell units transfused during hospital stay                                                                                     | Patients with a red blood cell transfusion during hospital stay                                                    | TKR, THR, CRC, CAV, HIF, GIB |
|           |                                                           | 3   | Total Transfusion Index                                                           | Total of red blood cell units transfused during hospital stay                                                                                     | All patients                                                                                                       | TKR, THR, CRC, CAV, HIF, GIB |
|           | Hard Outcomes                                             | 4   | In-hospital Mortality                                                             | Patients with exitus during hospital stay                                                                                                         | All patients                                                                                                       | TKR, THR, CRC, CAV, HIF, GIB |
|           |                                                           | 5   | Complications                                                                     | Patients with a PBM-related complications                                                                                                         | All patients                                                                                                       | TKR, THR, CRC, CAV, HIF, GIB |
|           |                                                           | 6   | Length of stay                                                                    | Sum of hospital stay days for all patients                                                                                                        | All patients                                                                                                       | TKR, THR, CRC, CAV, HIF, GIB |
|           |                                                           | 7   | 30-day related Readmissions                                                       | Patients with unscheduled 30 days related readmission                                                                                             | All patients                                                                                                       | TKR, THR, CRC, CAV, HIF, GIB |

1) In colorectal cancer resection 14-45 days before surgery

2) Ferritin as the determination which is always used in combination with others to assess iron metabolism

3) Only hospital use treatments are considered

4) Definition of anaemic patient follows current WHO criteria: Hb &lt;12 for women and 13 g/dL for men.

RC: colorectal cancer surgery, CAV: cardiac valve surgery; HIF: hip fracture; GIB: gastrointestinal bleeding; TKR: total knee replacement; THR: total hip replacement.

Table SIII - ICD10 Codes

**TOTAL KNEE REPLACEMENT (TKR) CODES**

Scheduled episodes (Circ. Admission = Scheduled) with knee replacement procedure. Episodes that also have a knee prosthesis removal procedure are excluded (since spare parts are excluded from the analysis).

**Knee replacement procedure codes**

|         |                                                              |
|---------|--------------------------------------------------------------|
| OSRC0J9 | Replace of R Knee Jt with Synth Sub, Cement, Open Approach   |
| OSRC0JA | Replace of R Knee Jt with Synth Sub, Uncement, Open Approach |
| OSRC0JZ | Replacement of R Knee Jt with Synth Sub, Open Approach       |
| OSRC0L9 | Replace of R Knee Jt with Med Unicnd, Cement, Open Approach  |
| OSRC0LA | Replace R Knee Jt w Med Unicnd, Uncement, Open               |
| OSRC0LZ | Replacement of R Knee Jt with Med Unicnd, Open Approach      |
| OSRC07Z | Replacement of R Knee Jt with Autol Sub, Open Approach       |
| OSRC0KZ | Replacement of R Knee Jt with Nonaut Sub, Open Approach      |
| OSRD0J9 | Replace of L Knee Jt with Synth Sub, Cement, Open Approach   |
| OSRD0JA | Replace of L Knee Jt with Synth Sub, Uncement, Open Approach |
| OSRD0JZ | Replacement of Left Knee Joint with Synth Sub, Open Approach |
| OSRD0L9 | Replace of L Knee Jt with Med Unicnd, Cement, Open Approach  |
| OSRD0LA | Replace L Knee Jt w Med Unicnd, Uncement, Open               |
| OSRD0LZ | Replacement of L Knee Jt with Med Unicnd, Open Approach      |
| OSRD07Z | Replacement of Left Knee Joint with Autol Sub, Open Approach |
| OSRD0KZ | Replacement of L Knee Jt with Nonaut Sub, Open Approach      |
| OSRT0J9 | Replace R Knee Jt, Femoral w Synth Sub, Cement, Open         |
| OSRT0JA | Replace R Knee Jt, Femoral w Synth Sub, Uncement, Open       |
| OSRT0JZ | Replace of R Knee Jt, Femoral with Synth Sub, Open Approach  |
| OSRT07Z | Replace of R Knee Jt, Femoral with Autol Sub, Open Approach  |
| OSRT0KZ | Replace of R Knee Jt, Femoral with Nonaut Sub, Open Approach |
| OSRU0J9 | Replace L Knee Jt, Femoral w Synth Sub, Cement, Open         |
| OSRU0JA | Replace L Knee Jt, Femoral w Synth Sub, Uncement, Open       |
| OSRU0JZ | Replace of L Knee Jt, Femoral with Synth Sub, Open Approach  |
| OSRU07Z | Replace of L Knee Jt, Femoral with Autol Sub, Open Approach  |
| OSRU0KZ | Replace of L Knee Jt, Femoral with Nonaut Sub, Open Approach |
| OSRV0J9 | Replace R Knee Jt, Tibial w Synth Sub, Cement, Open          |
| OSRV0JA | Replace R Knee Jt, Tibial w Synth Sub, Uncement, Open        |
| OSRV0JZ | Replace of R Knee Jt, Tibial with Synth Sub, Open Approach   |
| OSRV07Z | Replace of R Knee Jt, Tibial with Autol Sub, Open Approach   |
| OSRV0KZ | Replace of R Knee Jt, Tibial with Nonaut Sub, Open Approach  |
| OSRW0J9 | Replace L Knee Jt, Tibial w Synth Sub, Cement, Open          |
| OSRW0JA | Replace L Knee Jt, Tibial w Synth Sub, Uncement, Open        |
| OSRW0JZ | Replace of L Knee Jt, Tibial with Synth Sub, Open Approach   |
| OSRW07Z | Replace of L Knee Jt, Tibial with Autol Sub, Open Approach   |
| OSRW0KZ | Replace of L Knee Jt, Tibial with Nonaut Sub, Open Approach  |

**Knee replacement removal procedure codes**

|         |                                                             |
|---------|-------------------------------------------------------------|
| OSPC07Z | Removal of Autol Sub from R Knee Jt, Open Approach          |
| OSPC0JC | Removal of Synth Sub from R Knee Jt, Patella, Open Approach |
| OSPC0JZ | Removal of Synth Sub from R Knee Jt, Open Approach          |
| OSPC0KZ | Removal of Nonaut Sub from R Knee Jt, Open Approach         |
| OSPC37Z | Removal of Autol Sub from R Knee Jt, Perc Approach          |
| OSPC3JC | Removal of Synth Sub from R Knee Jt, Patella, Perc Approach |
| OSPC3JZ | Removal of Synth Sub from R Knee Jt, Perc Approach          |
| OSPC3KZ | Removal of Nonaut Sub from R Knee Jt, Perc Approach         |
| OSPC47Z | Removal of Autol Sub from R Knee Jt, Perc Endo Approach     |
| OSPC4JC | Remove Synth Sub from R Knee Jt, Patella, Perc Endo         |
| OSPC4JZ | Removal of Synth Sub from R Knee Jt, Perc Endo Approach     |
| OSPC4KZ | Removal of Nonaut Sub from R Knee Jt, Perc Endo Approach    |
| OSPD07Z | Removal of Autol Sub from L Knee Jt, Open Approach          |
| OSPD0JC | Removal of Synth Sub from L Knee Jt, Patella, Open Approach |
| OSPD0JZ | Removal of Synth Sub from L Knee Jt, Open Approach          |
| OSPD0KZ | Removal of Nonaut Sub from L Knee Jt, Open Approach         |
| OSPD37Z | Removal of Autol Sub from L Knee Jt, Perc Approach          |
| OSPD3JC | Removal of Synth Sub from L Knee Jt, Patella, Perc Approach |
| OSPD3JZ | Removal of Synth Sub from L Knee Jt, Perc Approach          |
| OSPD3KZ | Removal of Nonaut Sub from L Knee Jt, Perc Approach         |
| OSPD47Z | Removal of Autol Sub from L Knee Jt, Perc Endo Approach     |
| OSPD4JC | Remove Synth Sub from L Knee Jt, Patella, Perc Endo         |
| OSPD4JZ | Removal of Synth Sub from L Knee Jt, Perc Endo Approach     |
| OSPD4KZ | Removal of Nonaut Sub from L Knee Jt, Perc Endo Approach    |
| OSPT0JZ | Removal of Synth Sub from R Knee Jt, Femoral, Open Approach |
| OSPT3JZ | Removal of Synth Sub from R Knee Jt, Femoral, Perc Approach |
| OSPT4JZ | Remove Synth Sub from R Knee Jt, Femoral, Perc Endo         |

|         |                                                             |
|---------|-------------------------------------------------------------|
| OSPU0JZ | Removal of Synth Sub from L Knee Jt, Femoral, Open Approach |
| OSPU3JZ | Removal of Synth Sub from L Knee Jt, Femoral, Perc Approach |
| OSPU4JZ | Remove Synth Sub from L Knee Jt, Femoral, Perc Endo         |
| OSPV0JZ | Removal of Synth Sub from R Knee Jt, Tibial, Open Approach  |
| OSPV3JZ | Removal of Synth Sub from R Knee Jt, Tibial, Perc Approach  |
| OSPV4JZ | Remove Synth Sub from R Knee Jt, Tibial, Perc Endo          |
| OSPW0JZ | Removal of Synth Sub from L Knee Jt, Tibial, Open Approach  |
| OSPW3JZ | Removal of Synth Sub from L Knee Jt, Tibial, Perc Approach  |
| OSPW4JZ | Remove Synth Sub from L Knee Jt, Tibial, Perc Endo          |

**TOTAL HIP REPLACEMENT (THR) CODES**

Scheduled episodes (Circ. Admission = Scheduled) with hip replacement procedure. Episodes that also have hip fracture as primary diagnostic and/or hip prosthesis removal procedure are excluded (since spare parts are excluded from the analysis).

**Hip replacement procedure codes**

|         |                                                              |
|---------|--------------------------------------------------------------|
| OSR9019 | Replacement of R Hip Jt with Metal, Cement, Open Approach    |
| OSR901A | Replacement of R Hip Jt with Metal, Uncement, Open Approach  |
| OSR901Z | Replacement of Right Hip Joint with Metal, Open Approach     |
| OSR9029 | Replace R Hip Jt w Metal on Poly, Cement, Open               |
| OSR902A | Replace R Hip Jt w Metal on Poly, Uncement, Open             |
| OSR902Z | Replacement of R Hip Jt with Metal on Poly, Open Approach    |
| OSR9039 | Replacement of R Hip Jt with Ceramic, Cement, Open Approach  |
| OSR903A | Replace of R Hip Jt with Ceramic, Uncement, Open Approach    |
| OSR903Z | Replacement of Right Hip Joint with Ceramic, Open Approach   |
| OSR9049 | Replace R Hip Jt w Ceramic on Poly, Cement, Open             |
| OSR904A | Replace R Hip Jt w Ceramic on Poly, Uncement, Open           |
| OSR904Z | Replacement of R Hip Jt with Ceramic on Poly, Open Approach  |
| OSR90J9 | Replace of R Hip Jt with Synth Sub, Cement, Open Approach    |
| OSR90JA | Replace of R Hip Jt with Synth Sub, Uncement, Open Approach  |
| OSR90JZ | Replacement of Right Hip Joint with Synth Sub, Open Approach |
| OSR907Z | Replacement of Right Hip Joint with Autol Sub, Open Approach |
| OSR90KZ | Replacement of R Hip Jt with Nonaut Sub, Open Approach       |
| OSRB019 | Replacement of L Hip Jt with Metal, Cement, Open Approach    |
| OSRB01A | Replacement of L Hip Jt with Metal, Uncement, Open Approach  |
| OSRB01Z | Replacement of Left Hip Joint with Metal, Open Approach      |
| OSRB029 | Replace L Hip Jt w Metal on Poly, Cement, Open               |
| OSRB02A | Replace L Hip Jt w Metal on Poly, Uncement, Open             |
| OSRB02Z | Replacement of L Hip Jt with Metal on Poly, Open Approach    |
| OSRB039 | Replacement of L Hip Jt with Ceramic, Cement, Open Approach  |
| OSRB03A | Replace of L Hip Jt with Ceramic, Uncement, Open Approach    |
| OSRB03Z | Replacement of Left Hip Joint with Ceramic, Open Approach    |
| OSRB049 | Replace L Hip Jt w Ceramic on Poly, Cement, Open             |
| OSRB04A | Replace L Hip Jt w Ceramic on Poly, Uncement, Open           |
| OSRB04Z | Replacement of L Hip Jt with Ceramic on Poly, Open Approach  |
| OSRB0J9 | Replace of L Hip Jt with Synth Sub, Cement, Open Approach    |
| OSRB0JA | Replace of L Hip Jt with Synth Sub, Uncement, Open Approach  |
| OSRB0JZ | Replacement of Left Hip Joint with Synth Sub, Open Approach  |
| OSRB07Z | Replacement of Left Hip Joint with Autol Sub, Open Approach  |
| OSRB0KZ | Replacement of Left Hip Joint with Nonaut Sub, Open Approach |
| OSRR019 | Replace R Hip Jt, Femoral w Metal, Cement, Open              |
| OSRR01A | Replace R Hip Jt, Femoral w Metal, Uncement, Open            |
| OSRR01Z | Replacement of R Hip Jt, Femoral with Metal, Open Approach   |
| OSRR039 | Replace R Hip Jt, Femoral w Ceramic, Cement, Open            |
| OSRR03A | Replace R Hip Jt, Femoral w Ceramic, Uncement, Open          |
| OSRR03Z | Replacement of R Hip Jt, Femoral with Ceramic, Open Approach |
| OSRR0J9 | Replace R Hip Jt, Femoral w Synth Sub, Cement, Open          |
| OSRR0JA | Replace R Hip Jt, Femoral w Synth Sub, Uncement, Open        |
| OSRR0JZ | Replace of R Hip Jt, Femoral with Synth Sub, Open Approach   |
| OSRS019 | Replace L Hip Jt, Femoral w Metal, Cement, Open              |
| OSRS01A | Replace L Hip Jt, Femoral w Metal, Uncement, Open            |
| OSRS01Z | Replacement of L Hip Jt, Femoral with Metal, Open Approach   |
| OSRS039 | Replace L Hip Jt, Femoral w Ceramic, Cement, Open            |
| OSRS03A | Replace L Hip Jt, Femoral w Ceramic, Uncement, Open          |
| OSRS03Z | Replacement of L Hip Jt, Femoral with Ceramic, Open Approach |
| OSRS0J9 | Replace L Hip Jt, Femoral w Synth Sub, Cement, Open          |
| OSRS0JA | Replace L Hip Jt, Femoral w Synth Sub, Uncement, Open        |
| OSRS0JZ | Replace of L Hip Jt, Femoral with Synth Sub, Open Approach   |
| OSRA009 | Replace R Hip Jt, Acetab w Polyeth, Cement, Open             |
| OSRA00A | Replace R Hip Jt, Acetab w Polyeth, Uncement, Open           |
| OSRA00Z | Replacement of R Hip Jt, Acetab with Polyeth, Open Approach  |
| OSRA019 | Replace R Hip Jt, Acetab w Metal, Cement, Open               |

|                                       |                                                               |          |                                                              |
|---------------------------------------|---------------------------------------------------------------|----------|--------------------------------------------------------------|
| 0SRA01A                               | Replace R Hip Jt, Acetab w Metal, Uncement, Open              | S72.035B | Nondisp midcervical fx left femur, init for opn fx type I/2  |
| 0SRA01Z                               | Replacement of R Hip Jt, Acetab with Metal, Open Approach     | S72.035C | Nondisp midcervical fx l femur, init for opn fx type 3A/B/C  |
| 0SRA039                               | Replace R Hip Jt, Acetab w Ceramic, Cement, Open              | S72.036A | Nondisplaced midcervical fracture of unsp femur, init        |
| 0SRA03A                               | Replace R Hip Jt, Acetab w Ceramic, Uncement, Open            | S72.036B | Nondisp midcervical fx unsp femur, init for opn fx type I/2  |
| 0SRA03Z                               | Replacement of R Hip Jt, Acetab with Ceramic, Open Approach   | S72.036C | Nondisp midcervical fx unsp femr, 7thC                       |
| 0SRA0J9                               | Replace R Hip Jt, Acetab w Synth Sub, Cement, Open            | S72.041A | Disp fx of base of neck of right femur, init for clos fx     |
| 0SRA0JA                               | Replace R Hip Jt, Acetab w Synth Sub, Uncement, Open          | S72.041B | Disp fx of base of neck of r femur, init for opn fx type I/2 |
| 0SRA0JZ                               | Replace of R Hip Jt, Acetab with Synth Sub, Open Approach     | S72.041C | Disp fx of base of nk of r femr, init for opn fx type 3A/B/C |
| 0SRA07Z                               | Replace of R Hip Jt, Acetab with Autol Sub, Open Approach     | S72.042A | Disp fx of base of neck of left femur, init for clos fx      |
| 0SRA0KZ                               | Replace of R Hip Jt, Acetab with Nonaut Sub, Open Approach    | S72.042B | Disp fx of base of neck of l femur, init for opn fx type I/2 |
| 0SRE009                               | Replace L Hip Jt, Acetab w Polyeth, Cement, Open              | S72.042C | Disp fx of base of nk of l femr, init for opn fx type 3A/B/C |
| 0SRE00A                               | Replace L Hip Jt, Acetab w Polyeth, Uncement, Open            | S72.043A | Disp fx of base of neck of unsp femur, init for clos fx      |
| 0SRE00Z                               | Replacement of L Hip Jt, Acetab with Polyeth, Open Approach   | S72.043B | Disp fx of base of nk of unsp femr, init for opn fx type I/2 |
| 0SRE019                               | Replace L Hip Jt, Acetab w Metal, Cement, Open                | S72.043C | Disp fx of base of nk of unsp femr, 7thC                     |
| 0SRE01A                               | Replace L Hip Jt, Acetab w Metal, Uncement, Open              | S72.044A | Nondisp fx of base of neck of right femur, init for clos fx  |
| 0SRE01Z                               | Replacement of L Hip Jt, Acetab with Metal, Open Approach     | S72.044B | Nondisp fx of base of nk of r femr, init for opn fx type I/2 |
| 0SRE039                               | Replace L Hip Jt, Acetab w Ceramic, Cement, Open              | S72.044C | Nondisp fx of base of nk of r femr, 7thC                     |
| 0SRE03A                               | Replace L Hip Jt, Acetab w Ceramic, Uncement, Open            | S72.045A | Nondisp fx of base of neck of unsp femur, init for clos fx   |
| 0SRE03Z                               | Replacement of L Hip Jt, Acetab with Ceramic, Open Approach   | S72.045B | Nondisp fx of base of nk of l femr, init for opn fx type I/2 |
| 0SRE0J9                               | Replace L Hip Jt, Acetab w Synth Sub, Cement, Open            | S72.045C | Nondisp fx of base of nk of l femr, 7thC                     |
| 0SRE0JA                               | Replace L Hip Jt, Acetab w Synth Sub, Uncement, Open          | S72.046A | Nondisp fx of base of neck of unsp femur, init for clos fx   |
| 0SRE0JZ                               | Replace of L Hip Jt, Acetab with Synth Sub, Open Approach     | S72.046B | Nondisp fx of base of nk of unsp femr, 7thB                  |
| 0SRE07Z                               | Replace of L Hip Jt, Acetab with Autol Sub, Open Approach     | S72.046C | Nondisp fx of base of nk of unsp femr, 7thC                  |
| 0SRE0KZ                               | Replace of L Hip Jt, Acetab with Nonaut Sub, Open Approach    | S72.051A | Unsp fracture of head of right femur, init for clos fx       |
| <b>Femur fracture diagnosis codes</b> |                                                               |          |                                                              |
| S72.001A                              | Fracture of unsp part of neck of right femur, init            | S72.051B | Unsp fx head of right femur, init for opn fx type I/2        |
| S72.001B                              | Fx unsp part of neck of r femur, init for opn fx type I/2     | S72.051C | Unsp fx head of right femur, init for opn fx type 3A/B/C     |
| S72.001C                              | Fx unsp part of neck of r femur, init for opn fx type 3A/B/C  | S72.052A | Unsp fracture of head of left femur, init for clos fx        |
| S72.002A                              | Fracture of unsp part of neck of left femur, init             | S72.052B | Unsp fx head of left femur, init for opn fx type I/2         |
| S72.002B                              | Fx unsp part of neck of left femur, init for opn fx type I/2  | S72.052C | Unsp fx head of left femur, init for opn fx type 3A/B/C      |
| S72.002C                              | Fx unsp part of neck of l femur, init for opn fx type 3A/B/C  | S72.059A | Unsp fracture of head of unsp femur, init for clos fx        |
| S72.009A                              | Fracture of unsp part of neck of unsp femur, init             | S72.059B | Unsp fx head of unsp femur, init for opn fx type I/2         |
| S72.009B                              | Fx unsp part of neck of unsp femur, init for opn fx type I/2  | S72.059C | Unsp fx head of unsp femur, init for opn fx type 3A/B/C      |
| S72.009C                              | Fx unsp part of nk of unsp femr, init for opn fx type 3A/B/C  | S72.061A | Displaced articular fracture of head of right femur, init    |
| S72.011A                              | Unsp intracapsular fracture of right femur, init for clos fx  | S72.061B | Displaced artic fx head of r femur, init for opn fx type I/2 |
| S72.011B                              | Unsp intracap fx right femur, init for opn fx type I/2        | S72.061C | Displ artic fx head of r femur, init for opn fx type 3A/B/C  |
| S72.011C                              | Unsp intracap fx right femur, init for opn fx type 3A/B/C     | S72.062A | Displaced articular fracture of head of left femur, init     |
| S72.012A                              | Unsp intracapsular fracture of left femur, init for clos fx   | S72.062B | Displaced artic fx head of l femur, init for opn fx type I/2 |
| S72.012B                              | Unsp intracap fx left femur, init for opn fx type I/2         | S72.062C | Displ artic fx head of l femur, init for opn fx type 3A/B/C  |
| S72.012C                              | Unsp intracap fx left femur, init for opn fx type 3A/B/C      | S72.063A | Displaced articular fracture of head of unsp femur, init     |
| S72.019A                              | Unsp intracapsular fracture of unsp femur, init for clos fx   | S72.063B | Displ artic fx head of unsp femr, init for opn fx type I/2   |
| S72.019B                              | Unsp intracap fx unsp femur, init for opn fx type I/2         | S72.063C | Displ artic fx head of unsp femr, 7thC                       |
| S72.019C                              | Unsp intracap fx unsp femur, init for opn fx type 3A/B/C      | S72.064A | Nondisplaced articular fracture of head of right femur, init |
| S72.021A                              | Disp fx of epiphysis (separation) (upper) of r femur, init    | S72.064B | Nondisp artic fx head of r femur, init for opn fx type I/2   |
| S72.021B                              | Disp fx of epiphy (separation) (upper) of r femr, 7thB        | S72.064C | Nondisp artic fx head of r femr, init for opn fx type 3A/B/C |
| S72.021C                              | Disp fx of epiphy (separation) (upper) of r femr, 7thC        | S72.065A | Nondisplaced articular fracture of head of left femur, init  |
| S72.022A                              | Disp fx of epiphysis (separation) (upper) of l femur, init    | S72.065B | Nondisp artic fx head of l femur, init for opn fx type I/2   |
| S72.022B                              | Disp fx of epiphy (separation) (upper) of l femr, 7thB        | S72.065C | Nondisp artic fx head of l femr, init for opn fx type 3A/B/C |
| S72.022C                              | Disp fx of epiphy (separation) (upper) of l femr, 7thC        | S72.066A | Nondisplaced articular fracture of head of unsp femur, init  |
| S72.023A                              | Disp fx of epiphy (separation) (upper) of unsp femur, init    | S72.066B | Nondisp artic fx head of unsp femr, init for opn fx type I/2 |
| S72.023B                              | Disp fx of epiphy (separation) (upper) of unsp femr, 7thB     | S72.066C | Nondisp artic fx head of unsp femr, 7thC                     |
| S72.023C                              | Disp fx of epiphy (separation) (upper) of unsp femr, 7thC     | S72.091A | Oth fracture of head and neck of right femur, init           |
| S72.024A                              | Nondisp fx of epiphy (separation) (upper) of r femur, init    | S72.091B | Oth fx head/neck of right femur, init for opn fx type I/2    |
| S72.024B                              | Nondisp fx of epiphy (separation) (upper) of r femr, 7thB     | S72.091C | Oth fx head/neck of right femur, init for opn fx type 3A/B/C |
| S72.024C                              | Nondisp fx of epiphy (separation) (upper) of r femr, 7thC     | S72.092A | Oth fracture of head and neck of left femur, init            |
| S72.025A                              | Nondisp fx of epiphy (separation) (upper) of l femur, init    | S72.092B | Oth fx head/neck of left femur, init for opn fx type I/2     |
| S72.025B                              | Nondisp fx of epiphy (separation) (upper) of l femr, 7thB     | S72.092C | Oth fx head/neck of left femur, init for opn fx type 3A/B/C  |
| S72.025C                              | Nondisp fx of epiphy (separation) (upper) of l femr, 7thC     | S72.099A | Oth fracture of head and neck of unsp femur, init            |
| S72.026A                              | Nondisp fx of epiphy (separation) (upper) of unsp femr, init  | S72.099B | Oth fx head/neck of unsp femur, init for opn fx type I/2     |
| S72.026B                              | Nondisp fx of epiphys (separation) (upper) of unsp femr, 7thB | S72.099C | Oth fx head/neck of unsp femur, init for opn fx type 3A/B/C  |
| S72.026C                              | Nondisp fx of epiphys (separation) (upper) of unsp femr, 7thC | S72.101A | Unsp trochanteric fracture of right femur, init for clos fx  |
| S72.031A                              | Displaced midcervical fracture of right femur, init           | S72.101B | Unsp trochan fx right femur, init for opn fx type I/2        |
| S72.031B                              | Displaced midcervical fx r femur, init for opn fx type I/2    | S72.101C | Unsp trochan fx right femur, init for opn fx type 3A/B/C     |
| S72.031C                              | Displ midcervical fx r femur, init for opn fx type 3A/B/C     | S72.102A | Unsp trochanteric fracture of left femur, init for clos fx   |
| S72.032A                              | Displaced midcervical fracture of left femur, init            | S72.102B | Unsp trochan fx left femur, init for opn fx type I/2         |
| S72.032B                              | Displaced midcervical fx l femur, init for opn fx type I/2    | S72.102C | Unsp trochan fx left femur, init for opn fx type 3A/B/C      |
| S72.032C                              | Displ midcervical fx l femur, init for opn fx type 3A/B/C     | S72.109A | Unsp trochanteric fracture of unsp femur, init for clos fx   |
| S72.033A                              | Displaced midcervical fracture of unsp femur, init            | S72.109B | Unsp trochan fx unsp femur, init for opn fx type I/2         |
| S72.033B                              | Displ midcervical fx unsp femur, init for opn fx type I/2     | S72.109C | Unsp trochan fx unsp femur, init for opn fx type 3A/B/C      |
| S72.033C                              | Displ midcervical fx unsp femur, init for opn fx type 3A/B/C  | S72.111A | Disp fx of greater trochanter of right femur, init           |
| S72.034A                              | Nondisplaced midcervical fracture of right femur, init        | S72.111B | Disp fx of greater trochanter of r femr, 7thB                |
| S72.034B                              | Nondisp midcervical fx right femur, init for opn fx type I/2  | S72.111C | Disp fx of greater trochanter of r femr, 7thC                |
| S72.034C                              | Nondisp midcervical fx r femur, init for opn fx type 3A/B/C   | S72.112A | Disp fx of greater trochanter of left femur, init            |
| S72.035A                              | Nondisplaced midcervical fracture of left femur, init         | S72.112B | Disp fx of greater trochanter of l femr, 7thB                |
|                                       |                                                               | S72.112C | Disp fx of greater trochanter of l femr, 7thC                |
|                                       |                                                               | S72.113A | Disp fx of greater trochanter of unsp femr, init             |

S72.113B Disp fx of greater trochanter of unsp femr, 7thB  
 S72.113C Disp fx of greater trochanter of unsp femr, 7thC  
 S72.114A Nondisp fx of greater trochanter of right femur, init  
 S72.114B Nondisp fx of greater trochanter of r femr, 7thB  
 S72.114C Nondisp fx of greater trochanter of r femr, 7thC  
 S72.115A Nondisp fx of greater trochanter of left femur, init  
 S72.115B Nondisp fx of greater trochanter of l femr, 7thB  
 S72.115C Nondisp fx of greater trochanter of l femr, 7thC  
 S72.116A Nondisp fx of greater trochanter of unsp femur, init  
 S72.116B Nondisp fx of greater trochanter of unsp femr, 7thB  
 S72.116C Nondisp fx of greater trochanter of unsp femr, 7thC  
 S72.121A Disp fx of lesser trochanter of right femur, init  
 S72.121B Disp fx of less trochanter of r femr, 7thB  
 S72.121C Disp fx of less trochanter of r femr, 7thC  
 S72.122A Disp fx of lesser trochanter of left femur, init for clos fx  
 S72.122B Disp fx of less trochanter of l femr, 7thB  
 S72.122C Disp fx of less trochanter of l femr, 7thC  
 S72.123A Disp fx of lesser trochanter of unsp femur, init for clos fx  
 S72.123B Disp fx of less trochanter of unsp femr, 7thB  
 S72.123C Disp fx of less trochanter of unsp femr, 7thC  
 S72.124A Nondisp fx of lesser trochanter of right femur, init  
 S72.124B Nondisp fx of less trochanter of r femr, 7thB  
 S72.124C Nondisp fx of less trochanter of r femr, 7thC  
 S72.125A Nondisp fx of lesser trochanter of left femur, init  
 S72.125B Nondisp fx of less trochanter of l femr, 7thB  
 S72.125C Nondisp fx of less trochanter of l femr, 7thC  
 S72.126A Nondisp fx of lesser trochanter of unsp femur, init  
 S72.126B Nondisp fx of less trochanter of unsp femr, 7thB  
 S72.126C Nondisp fx of less trochanter of unsp femr, 7thC  
 S72.131A Displaced apophyseal fracture of right femur, init  
 S72.131B Displaced apophyseal fx r femur, init for opn fx type 1/2  
 S72.131C Displaced apophyseal fx r femur, init for opn fx type 3A/B/C  
 S72.132A Displaced apophyseal fracture of left femur, init  
 S72.132B Displaced apophyseal fx left femur, init for opn fx type 1/2  
 S72.132C Displaced apophyseal fx l femur, init for opn fx type 3A/B/C  
 S72.133A Displaced apophyseal fracture of unsp femur, init  
 S72.133B Displaced apophyseal fx unsp femur, init for opn fx type 1/2  
 S72.133C Displ apophyseal fx unsp femur, init for opn fx type 3A/B/C  
 S72.134A Nondisplaced apophyseal fracture of right femur, init  
 S72.134B Nondisp apophyseal fx right femur, init for opn fx type 1/2  
 S72.134C Nondisp apophyseal fx r femur, init for opn fx type 3A/B/C  
 S72.135A Nondisplaced apophyseal fracture of left femur, init  
 S72.135B Nondisp apophyseal fx left femur, init for opn fx type 1/2  
 S72.135C Nondisp apophyseal fx l femur, init for opn fx type 3A/B/C  
 S72.136A Nondisplaced apophyseal fracture of unsp femur, init  
 S72.136B Nondisp apophyseal fx unsp femur, init for opn fx type 1/2  
 S72.136C Nondisp apophyseal fx unsp femr, init for opn fx type 3A/B/C  
 S72.141A Displaced intertrochanteric fracture of right femur, init  
 S72.141B Displaced intertroch fx r femur, init for opn fx type 1/2  
 S72.141C Displaced intertroch fx r femur, init for opn fx type 3A/B/C  
 S72.142A Displaced intertrochanteric fracture of left femur, init  
 S72.142B Displaced intertroch fx left femur, init for opn fx type 1/2  
 S72.142C Displaced intertroch fx l femur, init for opn fx type 3A/B/C  
 S72.143A Displaced intertrochanteric fracture of unsp femur, init  
 S72.143B Displaced intertroch fx unsp femur, init for opn fx type 1/2  
 S72.143C Displ intertroch fx unsp femur, init for opn fx type 3A/B/C  
 S72.144A Nondisplaced intertrochanteric fracture of right femur, init  
 S72.144B Nondisp intertroch fx right femur, init for opn fx type 1/2  
 S72.144C Nondisp intertroch fx r femur, init for opn fx type 3A/B/C  
 S72.145A Nondisplaced intertrochanteric fracture of left femur, init  
 S72.145B Nondisp intertroch fx left femur, init for opn fx type 1/2  
 S72.145C Nondisp intertroch fx l femur, init for opn fx type 3A/B/C  
 S72.146A Nondisplaced intertrochanteric fracture of unsp femur, init  
 S72.146B Nondisp intertroch fx unsp femur, init for opn fx type 1/2  
 S72.146C Nondisp intertroch fx unsp femr, init for opn fx type 3A/B/C  
 S72.21XA Displaced subtrochanteric fracture of right femur, init  
 S72.21XB Displaced subtrochnt fx r femur, init for opn fx type 1/2  
 S72.21XC Displaced subtrochnt fx r femur, init for opn fx type 3A/B/C  
 S72.22XA Displaced subtrochanteric fracture of left femur, init  
 S72.22XB Displaced subtrochnt fx left femur, init for opn fx type 1/2  
 S72.22XC Displaced subtrochnt fx l femur, init for opn fx type 3A/B/C  
 S72.23XA Displaced subtrochanteric fracture of unsp femur, init  
 S72.23XB Displaced subtrochnt fx unsp femur, init for opn fx type 1/2  
 S72.23XC Displ subtrochnt fx unsp femur, init for opn fx type 3A/B/C  
 S72.24XA Nondisplaced subtrochanteric fracture of right femur, init

S72.24XB Nondisp subtrochnt fx right femur, init for opn fx type 1/2  
 S72.24XC Nondisp subtrochnt fx r femur, init for opn fx type 3A/B/C  
 S72.25XA Nondisplaced subtrochanteric fracture of left femur, init  
 S72.25XB Nondisp subtrochnt fx left femur, init for opn fx type 1/2  
 S72.25XC Nondisp subtrochnt fx l femur, init for opn fx type 3A/B/C  
 S72.26XA Nondisplaced subtrochanteric fracture of unsp femur, init  
 S72.26XB Nondisp subtrochnt fx unsp femur, init for opn fx type 1/2  
 S72.26XC Nondisp subtrochnt fx unsp femr, init for opn fx type 3A/B/C

**Hip Replacement Removal Procedure Codes**

OSP907Z Removal of Autol Sub from R Hip Jt, Open Approach  
 OSP90BZ Removal of Resurfacing Device from R Hip Jt, Open Approach  
 OSP90JZ Removal of Synthetic Substitute from R Hip Jt, Open Approach  
 OSP90KZ Removal of Nonaut Sub from R Hip Jt, Open Approach  
 OSP937Z Removal of Autol Sub from R Hip Jt, Perc Approach  
 OSP93JZ Removal of Synthetic Substitute from R Hip Jt, Perc Approach  
 OSP93KZ Removal of Nonaut Sub from R Hip Jt, Perc Approach  
 OSP947Z Removal of Autol Sub from R Hip Jt, Perc Endo Approach  
 OSP94JZ Removal of Synth Sub from R Hip Jt, Perc Endo Approach  
 OSP94KZ Removal of Nonaut Sub from R Hip Jt, Perc Endo Approach  
 OSPA0JZ Removal of Synth Sub from R Hip Jt, Acetab, Open Approach  
 OSPA3JZ Removal of Synth Sub from R Hip Jt, Acetab, Perc Approach  
 OSPA4JZ Remove Synth Sub from R Hip Jt, Acetab, Perc Endo  
 OSPB07Z Removal of Autol Sub from L Hip Jt, Open Approach  
 OSPB0BZ Removal of Resurfacing Device from L Hip Jt, Open Approach  
 OSPB0JZ Removal of Synthetic Substitute from L Hip Jt, Open Approach  
 OSPB0KZ Removal of Nonaut Sub from L Hip Jt, Open Approach  
 OSPB37Z Removal of Autol Sub from L Hip Jt, Perc Approach  
 OSPB3JZ Removal of Synthetic Substitute from L Hip Jt, Perc Approach  
 OSPB3KZ Removal of Nonaut Sub from L Hip Jt, Perc Approach  
 OSPB47Z Removal of Autol Sub from L Hip Jt, Perc Endo Approach  
 OSPB4JZ Removal of Synth Sub from L Hip Jt, Perc Endo Approach  
 OSPB4KZ Removal of Nonaut Sub from L Hip Jt, Perc Endo Approach  
 OSPE0JZ Removal of Synth Sub from L Hip Jt, Acetab, Open Approach  
 OSPE3JZ Removal of Synth Sub from L Hip Jt, Acetab, Perc Approach  
 OSPE4JZ Remove Synth Sub from L Hip Jt, Acetab, Perc Endo  
 OSPR0JZ Removal of Synth Sub from R Hip Jt, Femoral, Open Approach  
 OSPR3JZ Removal of Synth Sub from R Hip Jt, Femoral, Perc Approach  
 OSPR4JZ Remove Synth Sub from R Hip Jt, Femoral, Perc Endo  
 OSPS0JZ Removal of Synth Sub from L Hip Jt, Femoral, Open Approach  
 OSPS3JZ Removal of Synth Sub from L Hip Jt, Femoral, Perc Approach  
 OSPS4JZ Remove Synth Sub from L Hip Jt, Femoral, Perc Endo

**OPEN COLORECTAL CANCER SURGERY (CRC)**

Scheduled episodes (Circ. Admission = Scheduled) with primary diagnosis of colon and rectal neoplasia and with open colon and rectal procedure. Those episodes that also have a secondary diagnosis of metastasis are excluded.

**Colon and rectal neoplasia diagnostic codes**

C18.0 Malignant neoplasm of cecum  
 C18.1 Malignant neoplasm of appendix  
 C18.2 Malignant neoplasm of ascending colon  
 C18.3 Malignant neoplasm of hepatic flexure  
 C18.4 Malignant neoplasm of transverse colon  
 C18.5 Malignant neoplasm of splenic flexure  
 C18.6 Malignant neoplasm of descending colon  
 C18.7 Malignant neoplasm of sigmoid colon  
 C18.8 Malignant neoplasm of overlapping sites of colon  
 C18.9 Malignant neoplasm of colon, unspecified  
 C19 Malignant neoplasm of rectosigmoid junction  
 C20 Malignant neoplasm of rectum  
 C21.0 Malignant neoplasm of anus, unspecified  
 C21.1 Malignant neoplasm of anal canal  
 C21.2 Malignant neoplasm of cloacogenic zone  
 C21.8 Malig neoplasm of ovrlp sites of rectum, anus and anal canal  
 C7A.020 Malignant carcinoid tumor of the appendix  
 C7A.021 Malignant carcinoid tumor of the cecum  
 C7A.022 Malignant carcinoid tumor of the ascending colon  
 C7A.023 Malignant carcinoid tumor of the transverse colon  
 C7A.024 Malignant carcinoid tumor of the descending colon  
 C7A.025 Malignant carcinoid tumor of the sigmoid colon  
 C7A.026 Malignant carcinoid tumor of the rectum  
 C7A.029 Malignant carcinoid tumor of the lg int, unsp portion

**Open colon and rectum procedure codes**

|         |                                                   |
|---------|---------------------------------------------------|
| 0DTE0ZZ | Resection of Large Intestine, Open Approach       |
| 0DTF0ZZ | Resection of Right Large Intestine, Open Approach |
| 0DTG0ZZ | Resection of Left Large Intestine, Open Approach  |
| 0DTH0ZZ | Resection of Cecum, Open Approach                 |
| 0DTJ0ZZ | Resection of Appendix, Open Approach              |
| 0DTK0ZZ | Resection of Ascending Colon, Open Approach       |
| 0DTL0ZZ | Resection of Transverse Colon, Open Approach      |
| 0DTM0ZZ | Resection of Descending Colon, Open Approach      |
| 0DTN0ZZ | Resection of Sigmoid Colon, Open Approach         |
| 0DTP0ZZ | Resection of Rectum, Open Approach                |
| 0DTQ0ZZ | Resection of Anus, Open Approach                  |
| 0DBE0ZZ | Excision of Large Intestine, Open Approach        |
| 0DBF0ZZ | Excision of Right Large Intestine, Open Approach  |
| 0DBG0ZZ | Excision of Left Large Intestine, Open Approach   |
| 0DBH0ZZ | Excision of Cecum, Open Approach                  |
| 0DBJ0ZZ | Excision of Appendix, Open Approach               |
| 0DBK0ZZ | Excision of Ascending Colon, Open Approach        |
| 0DBL0ZZ | Excision of Transverse Colon, Open Approach       |
| 0DBM0ZZ | Excision of Descending Colon, Open Approach       |
| 0DBN0ZZ | Excision of Sigmoid Colon, Open Approach          |
| 0DBP0ZZ | Excision of Rectum, Open Approach                 |
| 0DBQ0ZZ | Excision of Anus, Open Approach                   |

**Metastasis diagnostic codes**

|        |                                                              |
|--------|--------------------------------------------------------------|
| C77.0  | Sec and unsp malig neoplasm of nodes of head, face and neck  |
| C77.1  | Secondary and unsp malignant neoplasm of intrathorac nodes   |
| C77.2  | Secondary and unsp malignant neoplasm of intra-abd nodes     |
| C77.3  | Sec and unsp malig neoplasm of axilla and upper limb nodes   |
| C77.4  | Sec and unsp malig neoplasm of inguinal and lower limb nodes |
| C77.5  | Secondary and unsp malignant neoplasm of intrapelv nodes     |
| C77.8  | Sec and unsp malig neoplasm of nodes of multiple regions     |
| C77.9  | Secondary and unsp malignant neoplasm of lymph node, unsp    |
| C78.00 | Secondary malignant neoplasm of unspecified lung             |
| C78.01 | Secondary malignant neoplasm of right lung                   |
| C78.02 | Secondary malignant neoplasm of left lung                    |
| C78.1  | Secondary malignant neoplasm of mediastinum                  |
| C78.2  | Secondary malignant neoplasm of pleura                       |
| C78.30 | Secondary malignant neoplasm of unsp respiratory organ       |
| C78.39 | Secondary malignant neoplasm of other respiratory organs     |
| C78.4  | Secondary malignant neoplasm of small intestine              |
| C78.5  | Secondary malignant neoplasm of large intestine and rectum   |
| C78.6  | Secondary malignant neoplasm of retroperiton and peritoneum  |
| C78.7  | Secondary malig neoplasm of liver and intrahepatic bile duct |
| C78.80 | Secondary malignant neoplasm of unspecified digestive organ  |
| C78.89 | Secondary malignant neoplasm of other digestive organs       |
| C79.00 | Secondary malignant neoplasm of unsp kidney and renal pelvis |
| C79.01 | Secondary malignant neoplasm of r kidney and renal pelvis    |
| C79.02 | Secondary malignant neoplasm of left kidney and renal pelvis |
| C79.10 | Secondary malignant neoplasm of unspecified urinary organs   |
| C79.11 | Secondary malignant neoplasm of bladder                      |
| C79.19 | Secondary malignant neoplasm of other urinary organs         |
| C79.2  | Secondary malignant neoplasm of skin                         |
| C79.31 | Secondary malignant neoplasm of brain                        |
| C79.32 | Secondary malignant neoplasm of cerebral meninges            |
| C79.40 | Secondary malignant neoplasm of unsp part of nervous system  |
| C79.49 | Secondary malignant neoplasm of oth parts of nervous system  |
| C79.51 | Secondary malignant neoplasm of bone                         |
| C79.52 | Secondary malignant neoplasm of bone marrow                  |
| C79.60 | Secondary malignant neoplasm of unspecified ovary            |
| C79.61 | Secondary malignant neoplasm of right ovary                  |
| C79.62 | Secondary malignant neoplasm of left ovary                   |
| C79.70 | Secondary malignant neoplasm of unspecified adrenal gland    |
| C79.71 | Secondary malignant neoplasm of right adrenal gland          |
| C79.72 | Secondary malignant neoplasm of left adrenal gland           |
| C79.81 | Secondary malignant neoplasm of breast                       |
| C79.82 | Secondary malignant neoplasm of genital organs               |
| C79.89 | Secondary malignant neoplasm of other specified sites        |
| C79.9  | Secondary malignant neoplasm of unspecified site             |
| C80.0  | Disseminated malignant neoplasm, unspecified                 |
| C80.1  | Malignant (primary) neoplasm, unspecified                    |
| C80.2  | Malignant neoplasm associated with transplanted organ        |
| C7B.00 | Secondary carcinoid tumors, unspecified site                 |
| C7B.01 | Secondary carcinoid tumors of distant lymph nodes            |

|        |                                           |
|--------|-------------------------------------------|
| C7B.02 | Secondary carcinoid tumors of liver       |
| C7B.03 | Secondary carcinoid tumors of bone        |
| C7B.04 | Secondary carcinoid tumors of peritoneum  |
| C7B.09 | Secondary carcinoid tumors of other sites |
| C7B.1  | Secondary Merkel cell carcinoma           |
| C7B.8  | Other secondary neuroendocrine tumors     |

**LAPAROSCOPIC COLORECTAL CANCER SURGERY (CRC)**

Scheduled episodes (Circ. Admission = Scheduled) with primary diagnosis of colon and rectal neoplasia and with laparoscopic colon and rectal procedure. Those episodes that also have a secondary diagnosis of metastasis are excluded.

**Colon and rectal neoplasia diagnostic codes**

|         |                                                              |
|---------|--------------------------------------------------------------|
| C18.0   | Malignant neoplasm of cecum                                  |
| C18.1   | Malignant neoplasm of appendix                               |
| C18.2   | Malignant neoplasm of ascending colon                        |
| C18.3   | Malignant neoplasm of hepatic flexure                        |
| C18.4   | Malignant neoplasm of transverse colon                       |
| C18.5   | Malignant neoplasm of splenic flexure                        |
| C18.6   | Malignant neoplasm of descending colon                       |
| C18.7   | Malignant neoplasm of sigmoid colon                          |
| C18.8   | Malignant neoplasm of overlapping sites of colon             |
| C18.9   | Malignant neoplasm of colon, unspecified                     |
| C19     | Malignant neoplasm of rectosigmoid junction                  |
| C20     | Malignant neoplasm of rectum                                 |
| C21.0   | Malignant neoplasm of anus, unspecified                      |
| C21.1   | Malignant neoplasm of anal canal                             |
| C21.2   | Malignant neoplasm of cloacogenic zone                       |
| C21.8   | Malig neoplasm of overl sites of rectum, anus and anal canal |
| C7A.020 | Malignant carcinoid tumor of the appendix                    |
| C7A.021 | Malignant carcinoid tumor of the cecum                       |
| C7A.022 | Malignant carcinoid tumor of the ascending colon             |
| C7A.023 | Malignant carcinoid tumor of the transverse colon            |
| C7A.024 | Malignant carcinoid tumor of the descending colon            |
| C7A.025 | Malignant carcinoid tumor of the sigmoid colon               |
| C7A.026 | Malignant carcinoid tumor of the rectum                      |
| C7A.029 | Malignant carcinoid tumor of the lg int, unsp portion        |

**Laparoscopic colon and rectum procedure codes**

|         |                                                              |
|---------|--------------------------------------------------------------|
| 0DTE4ZZ | Resection of Large Intestine, Perc Endo Approach             |
| 0DTE7ZZ | Resection of Large Intestine, Via Opening                    |
| 0DTE8ZZ | Resection of Large Intestine, Endo                           |
| 0DTF4ZZ | Resection of Right Large Intestine, Perc Endo Approach       |
| 0DTF7ZZ | Resection of Right Large Intestine, Via Opening              |
| 0DTF8ZZ | Resection of Right Large Intestine, Endo                     |
| 0DTG4ZZ | Resection of Left Large Intestine, Perc Endo Approach        |
| 0DTG7ZZ | Resection of Left Large Intestine, Via Opening               |
| 0DTG8ZZ | Resection of Left Large Intestine, Endo                      |
| 0DTH4ZZ | Resection of Cecum, Percutaneous Endoscopic Approach         |
| 0DTH7ZZ | Resection of Cecum, Via Natural or Artificial Opening        |
| 0DTH8ZZ | Resection of Cecum, Endo                                     |
| 0DTJ4ZZ | Resection of Appendix, Percutaneous Endoscopic Approach      |
| 0DTJ7ZZ | Resection of Appendix, Via Natural or Artificial Opening     |
| 0DTJ8ZZ | Resection of Appendix, Endo                                  |
| 0DTK4ZZ | Resection of Ascending Colon, Perc Endo Approach             |
| 0DTK7ZZ | Resection of Ascending Colon, Via Opening                    |
| 0DTK8ZZ | Resection of Ascending Colon, Endo                           |
| 0DTL4ZZ | Resection of Transverse Colon, Perc Endo Approach            |
| 0DTL7ZZ | Resection of Transverse Colon, Via Opening                   |
| 0DTL8ZZ | Resection of Transverse Colon, Endo                          |
| 0DTM4ZZ | Resection of Descending Colon, Perc Endo Approach            |
| 0DTM7ZZ | Resection of Descending Colon, Via Opening                   |
| 0DTM8ZZ | Resection of Descending Colon, Endo                          |
| 0DTN4ZZ | Resection of Sigmoid Colon, Percutaneous Endoscopic Approach |
| 0DTN7ZZ | Resection of Sigmoid Colon, Via Opening                      |
| 0DTN8ZZ | Resection of Sigmoid Colon, Endo                             |
| 0DTP4ZZ | Resection of Rectum, Percutaneous Endoscopic Approach        |
| 0DTP7ZZ | Resection of Rectum, Via Natural or Artificial Opening       |
| 0DTP8ZZ | Resection of Rectum, Endo                                    |
| 0DTQ4ZZ | Resection of Anus, Percutaneous Endoscopic Approach          |
| 0DTQ7ZZ | Resection of Anus, Via Natural or Artificial Opening         |
| 0DTQ8ZZ | Resection of Anus, Endo                                      |
| 0DBE3ZZ | Excision of Large Intestine, Percutaneous Approach           |

|         |                                                              |
|---------|--------------------------------------------------------------|
| 0DBE4ZZ | Excision of Large Intestine, Perc Endo Approach              |
| 0DBE7ZZ | Excision of Large Intestine, Via Opening                     |
| 0DBE8ZZ | Excision of Large Intestine, Endo                            |
| 0DBF3ZZ | Excision of Right Large Intestine, Percutaneous Approach     |
| 0DBF4ZZ | Excision of Right Large Intestine, Perc Endo Approach        |
| 0DBF7ZZ | Excision of Right Large Intestine, Via Opening               |
| 0DBF8ZZ | Excision of Right Large Intestine, Endo                      |
| 0DBG3ZZ | Excision of Left Large Intestine, Percutaneous Approach      |
| 0DBG4ZZ | Excision of Left Large Intestine, Perc Endo Approach         |
| 0DBG7ZZ | Excision of Left Large Intestine, Via Opening                |
| 0DBG8ZZ | Excision of Left Large Intestine, Endo                       |
| 0DBH3ZZ | Excision of Cecum, Percutaneous Approach                     |
| 0DBH4ZZ | Excision of Cecum, Percutaneous Endoscopic Approach          |
| 0DBH7ZZ | Excision of Cecum, Via Natural or Artificial Opening         |
| 0DBH8ZZ | Excision of Cecum, Endo                                      |
| 0DBJ3ZZ | Excision of Appendix, Percutaneous Approach                  |
| 0DBJ4ZZ | Excision of Appendix, Percutaneous Endoscopic Approach       |
| 0DBJ7ZZ | Excision of Appendix, Via Natural or Artificial Opening      |
| 0DBJ8ZZ | Excision of Appendix, Endo                                   |
| 0DBK3ZZ | Excision of Ascending Colon, Percutaneous Approach           |
| 0DBK4ZZ | Excision of Ascending Colon, Perc Endo Approach              |
| 0DBK7ZZ | Excision of Ascending Colon, Via Opening                     |
| 0DBK8ZZ | Excision of Ascending Colon, Endo                            |
| 0DBL3ZZ | Excision of Transverse Colon, Percutaneous Approach          |
| 0DBL4ZZ | Excision of Transverse Colon, Perc Endo Approach             |
| 0DBL7ZZ | Excision of Transverse Colon, Via Opening                    |
| 0DBL8ZZ | Excision of Transverse Colon, Endo                           |
| 0DBM3ZZ | Excision of Descending Colon, Percutaneous Approach          |
| 0DBM4ZZ | Excision of Descending Colon, Perc Endo Approach             |
| 0DBM7ZZ | Excision of Descending Colon, Via Opening                    |
| 0DBM8ZZ | Excision of Descending Colon, Endo                           |
| 0DBN3ZZ | Excision of Sigmoid Colon, Percutaneous Approach             |
| 0DBN4ZZ | Excision of Sigmoid Colon, Percutaneous Endoscopic Approach  |
| 0DBN7ZZ | Excision of Sigmoid Colon, Via Natural or Artificial Opening |
| 0DBN8ZZ | Excision of Sigmoid Colon, Endo                              |
| 0DBP3ZZ | Excision of Rectum, Percutaneous Approach                    |
| 0DBP4ZZ | Excision of Rectum, Percutaneous Endoscopic Approach         |
| 0DBP7ZZ | Excision of Rectum, Via Natural or Artificial Opening        |
| 0DBP8ZZ | Excision of Rectum, Endo                                     |
| 0DBQ3ZZ | Excision of Anus, Percutaneous Approach                      |
| 0DBQ4ZZ | Excision of Anus, Percutaneous Endoscopic Approach           |
| 0DBQ7ZZ | Excision of Anus, Via Natural or Artificial Opening          |
| 0DBQ8ZZ | Excision of Anus, Endo                                       |

**Metastasis diagnostic codes**

|        |                                                              |
|--------|--------------------------------------------------------------|
| C77.0  | Sec and unsp malig neoplasm of nodes of head, face and neck  |
| C77.1  | Secondary and unsp malignant neoplasm of intrathorac nodes   |
| C77.2  | Secondary and unsp malignant neoplasm of intra-abd nodes     |
| C77.3  | Sec and unsp malig neoplasm of axilla and upper limb nodes   |
| C77.4  | Sec and unsp malig neoplasm of inguinal and lower limb nodes |
| C77.5  | Secondary and unsp malignant neoplasm of intrapelv nodes     |
| C77.8  | Sec and unsp malig neoplasm of nodes of multiple regions     |
| C77.9  | Secondary and unsp malignant neoplasm of lymph node, unsp    |
| C78.00 | Secondary malignant neoplasm of unspecified lung             |
| C78.01 | Secondary malignant neoplasm of right lung                   |
| C78.02 | Secondary malignant neoplasm of left lung                    |
| C78.1  | Secondary malignant neoplasm of mediastinum                  |
| C78.2  | Secondary malignant neoplasm of pleura                       |
| C78.30 | Secondary malignant neoplasm of unsp respiratory organ       |
| C78.39 | Secondary malignant neoplasm of other respiratory organs     |
| C78.4  | Secondary malignant neoplasm of small intestine              |
| C78.5  | Secondary malignant neoplasm of large intestine and rectum   |
| C78.6  | Secondary malignant neoplasm of retroperiton and peritoneum  |
| C78.7  | Secondary malig neoplasm of liver and intrahepatic bile duct |
| C78.80 | Secondary malignant neoplasm of unspecified digestive organ  |
| C78.89 | Secondary malignant neoplasm of other digestive organs       |
| C79.00 | Secondary malignant neoplasm of unsp kidney and renal pelvis |
| C79.01 | Secondary malignant neoplasm of r kidney and renal pelvis    |
| C79.02 | Secondary malignant neoplasm of left kidney and renal pelvis |
| C79.10 | Secondary malignant neoplasm of unspecified urinary organs   |
| C79.11 | Secondary malignant neoplasm of bladder                      |
| C79.19 | Secondary malignant neoplasm of other urinary organs         |
| C79.2  | Secondary malignant neoplasm of skin                         |
| C79.31 | Secondary malignant neoplasm of brain                        |
| C79.32 | Secondary malignant neoplasm of cerebral meninges            |

|        |                                                             |
|--------|-------------------------------------------------------------|
| C79.40 | Secondary malignant neoplasm of unsp part of nervous system |
| C79.49 | Secondary malignant neoplasm of oth parts of nervous system |
| C79.51 | Secondary malignant neoplasm of bone                        |
| C79.52 | Secondary malignant neoplasm of bone marrow                 |
| C79.60 | Secondary malignant neoplasm of unspecified ovary           |
| C79.61 | Secondary malignant neoplasm of right ovary                 |
| C79.62 | Secondary malignant neoplasm of left ovary                  |
| C79.70 | Secondary malignant neoplasm of unspecified adrenal gland   |
| C79.71 | Secondary malignant neoplasm of right adrenal gland         |
| C79.72 | Secondary malignant neoplasm of left adrenal gland          |
| C79.81 | Secondary malignant neoplasm of breast                      |
| C79.82 | Secondary malignant neoplasm of genital organs              |
| C79.89 | Secondary malignant neoplasm of other specified sites       |
| C79.9  | Secondary malignant neoplasm of unspecified site            |
| C80.0  | Disseminated malignant neoplasm, unspecified                |
| C80.1  | Malignant (primary) neoplasm, unspecified                   |
| C80.2  | Malignant neoplasm associated with transplanted organ       |
| C7B.00 | Secondary carcinoid tumors, unspecified site                |
| C7B.01 | Secondary carcinoid tumors of distant lymph nodes           |
| C7B.02 | Secondary carcinoid tumors of liver                         |
| C7B.03 | Secondary carcinoid tumors of bone                          |
| C7B.04 | Secondary carcinoid tumors of peritoneum                    |
| C7B.09 | Secondary carcinoid tumors of other sites                   |
| C7B.1  | Secondary Merkel cell carcinoma                             |
| C7B.8  | Other secondary neuroendocrine tumors                       |

**CARDIAC VALVE SURGERY**

Scheduled episodes (Circ. Admission = Scheduled) with open surgery. Episodes that also have a heart transplant or bypass procedure are excluded.

**Cardiac valve procedure codes (open surgery)**

|         |                                                               |
|---------|---------------------------------------------------------------|
| 02QF0ZJ | Repair Aortic Valve created from Trunc Vlv, Open Approach     |
| 02QF0ZZ | Repair Aortic Valve, Open Approach                            |
| 02QGOZE | Repair Mitral Valve created from L AV Vlv, Open Approach      |
| 02QGOZZ | Repair Mitral Valve, Open Approach                            |
| 02QH0ZZ | Repair Pulmonary Valve, Open Approach                         |
| 02QJ0ZG | Repair Tricuspid Valve created from R AV Vlv, Open Approach   |
| 02QJ0ZZ | Repair Tricuspid Valve, Open Approach                         |
| 02RF08Z | Replacement of Aortic Valve with Autol Sub, Open Approach     |
| 02RF08Z | Replacement of Aortic Valve with Zooplastic, Open Approach    |
| 02RF0JZ | Replacement of Aortic Valve with Synth Sub, Open Approach     |
| 02RF0KZ | Replacement of Aortic Valve with Nonaut Sub, Open Approach    |
| 02RG07Z | Replacement of Mitral Valve with Autol Sub, Open Approach     |
| 02RG08Z | Replacement of Mitral Valve with Zooplastic, Open Approach    |
| 02RG0JZ | Replacement of Mitral Valve with Synth Sub, Open Approach     |
| 02RG0KZ | Replacement of Mitral Valve with Nonaut Sub, Open Approach    |
| 02RH07Z | Replacement of Pulmonary Valve with Autol Sub, Open Approach  |
| 02RH08Z | Replacement of Pulm Valve with Zooplastic, Open Approach      |
| 02RH0JZ | Replacement of Pulmonary Valve with Synth Sub, Open Approach  |
| 02RH0KZ | Replacement of Pulm Valve with Nonaut Sub, Open Approach      |
| 02RJ07Z | Replacement of Tricuspid Valve with Autol Sub, Open Approach  |
| 02RJ08Z | Replacement of Tricuspid Valve with Zooplastic, Open Approach |
| 02RJ0JZ | Replacement of Tricuspid Valve with Synth Sub, Open Approach  |
| 02RJ0KZ | Replacement of Tricuspid Valve with Nonaut Sub, Open Approach |

**Heart transplant procedure codes**

|         |                                                     |
|---------|-----------------------------------------------------|
| 02YA0Z0 | Transplantation of Heart, Allogeneic, Open Approach |
| 02YA0Z1 | Transplantation of Heart, Syngeneic, Open Approach  |
| 02YA0Z2 | Transplantation of Heart, Zooplastic, Open Approach |

**Bypass procedure codes**

|         |                                                              |
|---------|--------------------------------------------------------------|
| 0210083 | Bypass 1 Cor Art from Cor Art with Zooplastic, Open Approach |
| 0210088 | Bypass 1 Cor Art from R Int Mammary w Zooplastic, Open       |
| 0210089 | Bypass 1 Cor Art from L Int Mammary w Zooplastic, Open       |
| 021008C | Bypass 1 Cor Art from Thor Art w Zooplastic, Open            |
| 021008F | Bypass 1 Cor Art from Abd Art with Zooplastic, Open Approach |
| 021008W | Bypass 1 Cor Art from Aorta with Zooplastic, Open Approach   |
| 0210093 | Bypass 1 Cor Art from Cor Art with Autol Vn, Open Approach   |
| 0210098 | Bypass 1 Cor Art from R Int Mammary w Autol Vn, Open         |
| 0210099 | Bypass 1 Cor Art from L Int Mammary w Autol Vn, Open         |
| 021009C | Bypass 1 Cor Art from Thor Art with Autol Vn, Open Approach  |
| 021009F | Bypass 1 Cor Art from Abd Art with Autol Vn, Open Approach   |
| 021009W | Bypass 1 Cor Art from Aorta with Autol Vn, Open Approach     |

|         |                                                              |         |                                                              |
|---------|--------------------------------------------------------------|---------|--------------------------------------------------------------|
| 02100A3 | Bypass 1 Cor Art from Cor Art with Autol Art, Open Approach  | 02110A8 | Bypass 2 Cor Art from R Int Mammary w Autol Art, Open        |
| 02100A8 | Bypass 1 Cor Art from R Int Mammary w Autol Art, Open        | 02110A9 | Bypass 2 Cor Art from L Int Mammary w Autol Art, Open        |
| 02100A9 | Bypass 1 Cor Art from L Int Mammary w Autol Art, Open        | 02110AC | Bypass 2 Cor Art from Thor Art with Autol Art, Open Approach |
| 02100AC | Bypass 1 Cor Art from Thor Art with Autol Art, Open Approach | 02110AF | Bypass 2 Cor Art from Abd Art with Autol Art, Open Approach  |
| 02100AF | Bypass 1 Cor Art from Abd Art with Autol Art, Open Approach  | 02110AW | Bypass 2 Cor Art from Aorta with Autol Art, Open Approach    |
| 02100AW | Bypass 1 Cor Art from Aorta with Autol Art, Open Approach    | 02110J3 | Bypass 2 Cor Art from Cor Art with Synth Sub, Open Approach  |
| 02100J3 | Bypass 1 Cor Art from Cor Art with Synth Sub, Open Approach  | 02110J8 | Bypass 2 Cor Art from R Int Mammary w Synth Sub, Open        |
| 02100J8 | Bypass 1 Cor Art from R Int Mammary w Synth Sub, Open        | 02110J9 | Bypass 2 Cor Art from L Int Mammary w Synth Sub, Open        |
| 02100J9 | Bypass 1 Cor Art from L Int Mammary w Synth Sub, Open        | 02110JC | Bypass 2 Cor Art from Thor Art with Synth Sub, Open Approach |
| 02100JC | Bypass 1 Cor Art from Thor Art with Synth Sub, Open Approach | 02110JF | Bypass 2 Cor Art from Abd Art with Synth Sub, Open Approach  |
| 02100JF | Bypass 1 Cor Art from Aorta with Synth Sub, Open Approach    | 02110JW | Bypass 2 Cor Art from Aorta with Synth Sub, Open Approach    |
| 02100JW | Bypass 1 Cor Art from Aorta with Synth Sub, Open Approach    | 02110K3 | Bypass 2 Cor Art from Cor Art with Nonaut Sub, Open Approach |
| 02100K3 | Bypass 1 Cor Art from Cor Art with Nonaut Sub, Open Approach | 02110K8 | Bypass 2 Cor Art from R Int Mammary w Nonaut Sub, Open       |
| 02100K8 | Bypass 1 Cor Art from R Int Mammary w Nonaut Sub, Open       | 02110K9 | Bypass 2 Cor Art from L Int Mammary w Nonaut Sub, Open       |
| 02100K9 | Bypass 1 Cor Art from L Int Mammary w Nonaut Sub, Open       | 02110KC | Bypass 2 Cor Art from Thor Art w Nonaut Sub, Open            |
| 02100KC | Bypass 1 Cor Art from Thor Art w Nonaut Sub, Open            | 02110KF | Bypass 2 Cor Art from Abd Art with Nonaut Sub, Open Approach |
| 02100KF | Bypass 1 Cor Art from Abd Art with Nonaut Sub, Open Approach | 02110KW | Bypass 2 Cor Art from Aorta with Nonaut Sub, Open Approach   |
| 02100KW | Bypass 1 Cor Art from Aorta with Nonaut Sub, Open Approach   | 02110Z3 | Bypass 2 Cor Art from Cor Art, Open Approach                 |
| 02100Z3 | Bypass 1 Cor Art from Cor Art, Open Approach                 | 02110Z8 | Bypass 2 Cor Art from R Int Mammary, Open Approach           |
| 02100Z8 | Bypass 1 Cor Art from R Int Mammary, Open Approach           | 02110Z9 | Bypass 2 Cor Art from L Int Mammary, Open Approach           |
| 02100Z9 | Bypass 1 Cor Art from L Int Mammary, Open Approach           | 02110ZC | Bypass 2 Cor Art from Thor Art, Open Approach                |
| 02100ZC | Bypass 1 Cor Art from Thor Art, Open Approach                | 02110ZF | Bypass 2 Cor Art from Abd Art, Open Approach                 |
| 02100ZF | Bypass 1 Cor Art from Abd Art, Open Approach                 | 0211344 | Bypass 2 Cor Art from Cor V w Drug-elut Intra, Perc          |
| 0210344 | Bypass 1 Cor Art from Cor V w Drug-elut Intra, Perc          | 02113D4 | Bypass 2 Cor Art from Cor V with Intralum Dev, Perc Approach |
| 02103D4 | Bypass 1 Cor Art from Cor V with Intralum Dev, Perc Approach | 0211444 | Bypass 2 Cor Art from Cor V w Drug-elut Intra, Perc Endo     |
| 0210444 | Bypass 1 Cor Art from Cor V w Drug-elut Intra, Perc Endo     | 0211483 | Bypass 2 Cor Art from Cor Art w Zooplastic, Perc Endo        |
| 0210483 | Bypass 1 Cor Art from Cor Art w Zooplastic, Perc Endo        | 0211488 | Bypass 2 Cor Art from R Int Mammary w Zooplastic, Perc Endo  |
| 0210488 | Bypass 1 Cor Art from R Int Mammary w Zooplastic, Perc Endo  | 0211489 | Bypass 2 Cor Art from L Int Mammary w Zooplastic, Perc Endo  |
| 0210489 | Bypass 1 Cor Art from L Int Mammary w Zooplastic, Perc Endo  | 021148C | Bypass 2 Cor Art from Thor Art w Zooplastic, Perc Endo       |
| 021048C | Bypass 1 Cor Art from Thor Art w Zooplastic, Perc Endo       | 021148F | Bypass 2 Cor Art from Abd Art w Zooplastic, Perc Endo        |
| 021048F | Bypass 1 Cor Art from Abd Art w Zooplastic, Perc Endo        | 021148W | Bypass 2 Cor Art from Aorta w Zooplastic, Perc Endo          |
| 021048W | Bypass 1 Cor Art from Aorta w Zooplastic, Perc Endo          | 0211493 | Bypass 2 Cor Art from Cor Art w Autol Vn, Perc Endo          |
| 0210493 | Bypass 1 Cor Art from Cor Art w Autol Vn, Perc Endo          | 0211498 | Bypass 2 Cor Art from R Int Mammary w Autol Vn, Perc Endo    |
| 0210498 | Bypass 1 Cor Art from R Int Mammary w Autol Vn, Perc Endo    | 0211499 | Bypass 2 Cor Art from L Int Mammary w Autol Vn, Perc Endo    |
| 0210499 | Bypass 1 Cor Art from L Int Mammary w Autol Vn, Perc Endo    | 021149C | Bypass 2 Cor Art from Thor Art w Autol Vn, Perc Endo         |
| 021049C | Bypass 1 Cor Art from Thor Art w Autol Vn, Perc Endo         | 021149F | Bypass 2 Cor Art from Abd Art w Autol Vn, Perc Endo          |
| 021049F | Bypass 1 Cor Art from Abd Art w Autol Vn, Perc Endo          | 021149W | Bypass 2 Cor Art from Aorta w Autol Vn, Perc Endo            |
| 021049W | Bypass 1 Cor Art from Aorta w Autol Vn, Perc Endo            | 02114A3 | Bypass 2 Cor Art from Cor Art w Autol Art, Perc Endo         |
| 02104A3 | Bypass 1 Cor Art from Cor Art w Autol Art, Perc Endo         | 02114A8 | Bypass 2 Cor Art from R Int Mammary w Autol Art, Perc Endo   |
| 02104A8 | Bypass 1 Cor Art from R Int Mammary w Autol Art, Perc Endo   | 02114A9 | Bypass 2 Cor Art from L Int Mammary w Autol Art, Perc Endo   |
| 02104A9 | Bypass 1 Cor Art from L Int Mammary w Autol Art, Perc Endo   | 02114AC | Bypass 2 Cor Art from Thor Art w Autol Art, Perc Endo        |
| 02104AC | Bypass 1 Cor Art from Thor Art w Autol Art, Perc Endo        | 02114AF | Bypass 2 Cor Art from Abd Art w Autol Art, Perc Endo         |
| 02104AF | Bypass 1 Cor Art from Abd Art w Autol Art, Perc Endo         | 02114AW | Bypass 2 Cor Art from Aorta w Autol Art, Perc Endo           |
| 02104AW | Bypass 1 Cor Art from Aorta w Autol Art, Perc Endo           | 02114D4 | Bypass 2 Cor Art from Cor V w Intralum Dev, Perc Endo        |
| 02104D4 | Bypass 1 Cor Art from Cor V w Intralum Dev, Perc Endo        | 02114J3 | Bypass 2 Cor Art from Cor Art w Synth Sub, Perc Endo         |
| 02104J3 | Bypass 1 Cor Art from Cor Art w Synth Sub, Perc Endo         | 02114J8 | Bypass 2 Cor Art from R Int Mammary w Synth Sub, Perc Endo   |
| 02104J8 | Bypass 1 Cor Art from R Int Mammary w Synth Sub, Perc Endo   | 02114J9 | Bypass 2 Cor Art from L Int Mammary w Synth Sub, Perc Endo   |
| 02104J9 | Bypass 1 Cor Art from L Int Mammary w Synth Sub, Perc Endo   | 02114JC | Bypass 2 Cor Art from Thor Art w Synth Sub, Perc Endo        |
| 02104JC | Bypass 1 Cor Art from Thor Art w Synth Sub, Perc Endo        | 02114JF | Bypass 2 Cor Art from Abd Art w Synth Sub, Perc Endo         |
| 02104JF | Bypass 1 Cor Art from Abd Art w Synth Sub, Perc Endo         | 02114JW | Bypass 2 Cor Art from Aorta w Synth Sub, Perc Endo           |
| 02104JW | Bypass 1 Cor Art from Aorta w Synth Sub, Perc Endo           | 02114K3 | Bypass 2 Cor Art from Cor Art w Nonaut Sub, Perc Endo        |
| 02104K3 | Bypass 1 Cor Art from Cor Art w Nonaut Sub, Perc Endo        | 02114K8 | Bypass 2 Cor Art from R Int Mammary w Nonaut Sub, Perc Endo  |
| 02104K8 | Bypass 1 Cor Art from R Int Mammary w Nonaut Sub, Perc Endo  | 02114K9 | Bypass 2 Cor Art from L Int Mammary w Nonaut Sub, Perc Endo  |
| 02104K9 | Bypass 1 Cor Art from L Int Mammary w Nonaut Sub, Perc Endo  | 02114KC | Bypass 2 Cor Art from Thor Art w Nonaut Sub, Perc Endo       |
| 02104KC | Bypass 1 Cor Art from Thor Art w Nonaut Sub, Perc Endo       | 02114KF | Bypass 2 Cor Art from Abd Art w Nonaut Sub, Perc Endo        |
| 02104KF | Bypass 1 Cor Art from Abd Art w Nonaut Sub, Perc Endo        | 02114KW | Bypass 2 Cor Art from Aorta w Nonaut Sub, Perc Endo          |
| 02104KW | Bypass 1 Cor Art from Aorta w Nonaut Sub, Perc Endo          | 02114Z3 | Bypass 2 Cor Art from Cor Art, Perc Endo Approach            |
| 02104Z3 | Bypass 1 Cor Art from Cor Art, Perc Endo Approach            | 02114Z8 | Bypass 2 Cor Art from R Int Mammary, Perc Endo Approach      |
| 02104Z8 | Bypass 1 Cor Art from R Int Mammary, Perc Endo Approach      | 02114Z9 | Bypass 2 Cor Art from L Int Mammary, Perc Endo Approach      |
| 02104Z9 | Bypass 1 Cor Art from L Int Mammary, Perc Endo Approach      | 02114ZC | Bypass 2 Cor Art from Thor Art, Perc Endo Approach           |
| 02104ZC | Bypass 1 Cor Art from Thor Art, Perc Endo Approach           | 02114ZF | Bypass 2 Cor Art from Abd Art, Perc Endo Approach            |
| 02104ZF | Bypass 1 Cor Art from Abd Art, Perc Endo Approach            | 0212083 | Bypass 3 Cor Art from Cor Art with Zooplastic, Open Approach |
| 0211083 | Bypass 2 Cor Art from Cor Art with Zooplastic, Open Approach | 0212088 | Bypass 3 Cor Art from R Int Mammary w Zooplastic, Open       |
| 0211088 | Bypass 2 Cor Art from R Int Mammary w Zooplastic, Open       | 0212089 | Bypass 3 Cor Art from L Int Mammary w Zooplastic, Open       |
| 0211089 | Bypass 2 Cor Art from L Int Mammary w Zooplastic, Open       | 021208C | Bypass 3 Cor Art from Thor Art w Zooplastic, Open            |
| 021108C | Bypass 2 Cor Art from Thor Art w Zooplastic, Open            | 021208F | Bypass 3 Cor Art from Abd Art with Zooplastic, Open Approach |
| 021108F | Bypass 2 Cor Art from Abd Art with Zooplastic, Open Approach | 021208W | Bypass 3 Cor Art from Aorta with Zooplastic, Open Approach   |
| 021108W | Bypass 2 Cor Art from Aorta with Zooplastic, Open Approach   | 0212093 | Bypass 3 Cor Art from Cor Art with Autol Vn, Open Approach   |
| 0211093 | Bypass 2 Cor Art from Cor Art with Autol Vn, Open Approach   | 0212098 | Bypass 3 Cor Art from R Int Mammary w Autol Vn, Open         |
| 0211098 | Bypass 2 Cor Art from R Int Mammary w Autol Vn, Open         | 0212099 | Bypass 3 Cor Art from L Int Mammary w Autol Vn, Open         |
| 0211099 | Bypass 2 Cor Art from L Int Mammary w Autol Vn, Open         | 021209C | Bypass 3 Cor Art from Thor Art with Autol Vn, Open Approach  |
| 021109C | Bypass 2 Cor Art from Thor Art with Autol Vn, Open Approach  | 021209F | Bypass 3 Cor Art from Abd Art with Autol Vn, Open Approach   |
| 021109F | Bypass 2 Cor Art from Abd Art with Autol Vn, Open Approach   | 021209W | Bypass 3 Cor Art from Aorta with Autol Vn, Open Approach     |
| 021109W | Bypass 2 Cor Art from Aorta with Autol Vn, Open Approach     | 02120A3 | Bypass 3 Cor Art from Cor Art with Autol Art, Open Approach  |
| 02110A3 | Bypass 2 Cor Art from Cor Art with Autol Art, Open Approach  | 02120A8 | Bypass 3 Cor Art from R Int Mammary w Autol Art, Open        |



|         |                                                              |         |                                                              |
|---------|--------------------------------------------------------------|---------|--------------------------------------------------------------|
| 02120A9 | Bypass 3 Cor Art from L Int Mammary w Autol Art, Open        | 02130AC | Bypass 4+ Cor Art from Thor Art w Autol Art, Open            |
| 02120AC | Bypass 3 Cor Art from Thor Art with Autol Art, Open Approach | 02130AF | Bypass 4+ Cor Art from Abd Art with Autol Art, Open Approach |
| 02120AF | Bypass 3 Cor Art from Abd Art with Autol Art, Open Approach  | 02130AW | Bypass 4+ Cor Art from Aorta with Autol Art, Open Approach   |
| 02120AW | Bypass 3 Cor Art from Aorta with Autol Art, Open Approach    | 02130J3 | Bypass 4+ Cor Art from Cor Art with Synth Sub, Open Approach |
| 02120J3 | Bypass 3 Cor Art from Cor Art with Synth Sub, Open Approach  | 02130J8 | Bypass 4+ Cor Art from R Int Mammary w Synth Sub, Open       |
| 02120J8 | Bypass 3 Cor Art from R Int Mammary w Synth Sub, Open        | 02130J9 | Bypass 4+ Cor Art from L Int Mammary w Synth Sub, Open       |
| 02120J9 | Bypass 3 Cor Art from L Int Mammary w Synth Sub, Open        | 02130JC | Bypass 4+ Cor Art from Thor Art w Synth Sub, Open            |
| 02120JC | Bypass 3 Cor Art from Thor Art with Synth Sub, Open Approach | 02130JF | Bypass 4+ Cor Art from Abd Art with Synth Sub, Open Approach |
| 02120JF | Bypass 3 Cor Art from Abd Art with Synth Sub, Open Approach  | 02130JW | Bypass 4+ Cor Art from Aorta with Synth Sub, Open Approach   |
| 02120JW | Bypass 3 Cor Art from Aorta with Synth Sub, Open Approach    | 02130K3 | Bypass 4+ Cor Art from Cor Art w Nonaut Sub, Open            |
| 02120K3 | Bypass 3 Cor Art from Cor Art with Nonaut Sub, Open Approach | 02130K8 | Bypass 4+ Cor Art from R Int Mammary w Nonaut Sub, Open      |
| 02120K8 | Bypass 3 Cor Art from R Int Mammary w Nonaut Sub, Open       | 02130K9 | Bypass 4+ Cor Art from L Int Mammary w Nonaut Sub, Open      |
| 02120K9 | Bypass 3 Cor Art from L Int Mammary w Nonaut Sub, Open       | 02130KC | Bypass 4+ Cor Art from Thor Art w Nonaut Sub, Open           |
| 02120KC | Bypass 3 Cor Art from Thor Art w Nonaut Sub, Open            | 02130KF | Bypass 4+ Cor Art from Abd Art w Nonaut Sub, Open            |
| 02120KF | Bypass 3 Cor Art from Abd Art with Nonaut Sub, Open Approach | 02130KW | Bypass 4+ Cor Art from Aorta with Nonaut Sub, Open Approach  |
| 02120KW | Bypass 3 Cor Art from Aorta with Nonaut Sub, Open Approach   | 02130Z3 | Bypass 4+ Cor Art from Cor Art, Open Approach                |
| 02120Z3 | Bypass 3 Cor Art from Cor Art, Open Approach                 | 02130Z8 | Bypass 4+ Cor Art from R Int Mammary, Open Approach          |
| 02120Z8 | Bypass 3 Cor Art from R Int Mammary, Open Approach           | 02130Z9 | Bypass 4+ Cor Art from L Int Mammary, Open Approach          |
| 02120Z9 | Bypass 3 Cor Art from L Int Mammary, Open Approach           | 02130ZC | Bypass 4+ Cor Art from Thor Art, Open Approach               |
| 02120ZC | Bypass 3 Cor Art from Thor Art, Open Approach                | 02130ZF | Bypass 4+ Cor Art from Abd Art, Open Approach                |
| 02120ZF | Bypass 3 Cor Art from Abd Art, Open Approach                 | 0213344 | Bypass 4+ Cor Art from Cor V w Drug-elut Intra, Perc         |
| 0212344 | Bypass 3 Cor Art from Cor V w Drug-elut Intra, Perc          | 02133D4 | Bypass 4+ Cor Art from Cor V w Intralum Dev, Perc            |
| 02123D4 | Bypass 3 Cor Art from Cor V with Intralum Dev, Perc Approach | 0213444 | Bypass 4+ Cor Art from Cor V w Drug-elut Intra, Perc Endo    |
| 0212444 | Bypass 3 Cor Art from Cor V w Drug-elut Intra, Perc Endo     | 0213483 | Bypass 4+ Cor Art from Cor Art w Zooplastic, Perc Endo       |
| 0212483 | Bypass 3 Cor Art from Cor Art w Zooplastic, Perc Endo        | 0213488 | Bypass 4+ Cor Art from R Int Mammary w Zooplastic, Perc Endo |
| 0212488 | Bypass 3 Cor Art from R Int Mammary w Zooplastic, Perc Endo  | 0213489 | Bypass 4+ Cor Art from L Int Mammary w Zooplastic, Perc Endo |
| 0212489 | Bypass 3 Cor Art from L Int Mammary w Zooplastic, Perc Endo  | 021348C | Bypass 4+ Cor Art from Thor Art w Zooplastic, Perc Endo      |
| 021248C | Bypass 3 Cor Art from Thor Art w Zooplastic, Perc Endo       | 021348F | Bypass 4+ Cor Art from Abd Art w Zooplastic, Perc Endo       |
| 021248F | Bypass 3 Cor Art from Abd Art w Zooplastic, Perc Endo        | 021348W | Bypass 4+ Cor Art from Aorta w Zooplastic, Perc Endo         |
| 021248W | Bypass 3 Cor Art from Aorta w Zooplastic, Perc Endo          | 0213493 | Bypass 4+ Cor Art from Cor Art w Autol Vn, Perc Endo         |
| 0212493 | Bypass 3 Cor Art from Cor Art w Autol Vn, Perc Endo          | 0213498 | Bypass 4+ Cor Art from R Int Mammary w Autol Vn, Perc Endo   |
| 0212498 | Bypass 3 Cor Art from R Int Mammary w Autol Vn, Perc Endo    | 0213499 | Bypass 4+ Cor Art from L Int Mammary w Autol Vn, Perc Endo   |
| 0212499 | Bypass 3 Cor Art from L Int Mammary w Autol Vn, Perc Endo    | 021349C | Bypass 4+ Cor Art from Thor Art w Autol Vn, Perc Endo        |
| 021249C | Bypass 3 Cor Art from Thor Art w Autol Vn, Perc Endo         | 021349F | Bypass 4+ Cor Art from Abd Art w Autol Vn, Perc Endo         |
| 021249F | Bypass 3 Cor Art from Abd Art w Autol Vn, Perc Endo          | 021349W | Bypass 4+ Cor Art from Aorta w Autol Vn, Perc Endo           |
| 021249W | Bypass 3 Cor Art from Aorta w Autol Vn, Perc Endo            | 02134A3 | Bypass 4+ Cor Art from Cor Art w Autol Art, Perc Endo        |
| 02124A3 | Bypass 3 Cor Art from Cor Art w Autol Art, Perc Endo         | 02134A8 | Bypass 4+ Cor Art from R Int Mammary w Autol Art, Perc Endo  |
| 02124A8 | Bypass 3 Cor Art from R Int Mammary w Autol Art, Perc Endo   | 02134A9 | Bypass 4+ Cor Art from L Int Mammary w Autol Art, Perc Endo  |
| 02124A9 | Bypass 3 Cor Art from L Int Mammary w Autol Art, Perc Endo   | 02134AC | Bypass 4+ Cor Art from Thor Art w Autol Art, Perc Endo       |
| 02124AC | Bypass 3 Cor Art from Thor Art w Autol Art, Perc Endo        | 02134AF | Bypass 4+ Cor Art from Abd Art w Autol Art, Perc Endo        |
| 02124AF | Bypass 3 Cor Art from Abd Art w Autol Art, Perc Endo         | 02134AW | Bypass 4+ Cor Art from Aorta w Autol Art, Perc Endo          |
| 02124AW | Bypass 3 Cor Art from Aorta w Autol Art, Perc Endo           | 02134D4 | Bypass 4+ Cor Art from Cor V w Intralum Dev, Perc Endo       |
| 02124D4 | Bypass 3 Cor Art from Cor V w Intralum Dev, Perc Endo        | 02134J3 | Bypass 4+ Cor Art from Cor Art w Synth Sub, Perc Endo        |
| 02124J3 | Bypass 3 Cor Art from Cor Art w Synth Sub, Perc Endo         | 02134J8 | Bypass 4+ Cor Art from R Int Mammary w Synth Sub, Perc Endo  |
| 02124J8 | Bypass 3 Cor Art from R Int Mammary w Synth Sub, Perc Endo   | 02134J9 | Bypass 4+ Cor Art from L Int Mammary w Synth Sub, Perc Endo  |
| 02124J9 | Bypass 3 Cor Art from L Int Mammary w Synth Sub, Perc Endo   | 02134JC | Bypass 4+ Cor Art from Thor Art w Synth Sub, Perc Endo       |
| 02124JC | Bypass 3 Cor Art from Thor Art w Synth Sub, Perc Endo        | 02134JF | Bypass 4+ Cor Art from Abd Art w Synth Sub, Perc Endo        |
| 02124JF | Bypass 3 Cor Art from Abd Art w Synth Sub, Perc Endo         | 02134JW | Bypass 4+ Cor Art from Aorta w Synth Sub, Perc Endo          |
| 02124JW | Bypass 3 Cor Art from Aorta w Synth Sub, Perc Endo           | 02134K3 | Bypass 4+ Cor Art from Cor Art w Nonaut Sub, Perc Endo       |
| 02124K3 | Bypass 3 Cor Art from Cor Art w Nonaut Sub, Perc Endo        | 02134K8 | Bypass 4+ Cor Art from R Int Mammary w Nonaut Sub, Perc Endo |
| 02124K8 | Bypass 3 Cor Art from R Int Mammary w Nonaut Sub, Perc Endo  | 02134K9 | Bypass 4+ Cor Art from L Int Mammary w Nonaut Sub, Perc Endo |
| 02124K9 | Bypass 3 Cor Art from L Int Mammary w Nonaut Sub, Perc Endo  | 02134KC | Bypass 4+ Cor Art from Thor Art w Nonaut Sub, Perc Endo      |
| 02124KC | Bypass 3 Cor Art from Thor Art w Nonaut Sub, Perc Endo       | 02134KF | Bypass 4+ Cor Art from Abd Art w Nonaut Sub, Perc Endo       |
| 02124KF | Bypass 3 Cor Art from Abd Art w Nonaut Sub, Perc Endo        | 02134KW | Bypass 4+ Cor Art from Aorta w Nonaut Sub, Perc Endo         |
| 02124KW | Bypass 3 Cor Art from Aorta w Nonaut Sub, Perc Endo          | 02134Z3 | Bypass 4+ Cor Art from Cor Art, Perc Endo Approach           |
| 02124Z3 | Bypass 3 Cor Art from Cor Art, Perc Endo Approach            | 02134Z8 | Bypass 4+ Cor Art from R Int Mammary, Perc Endo Approach     |
| 02124Z8 | Bypass 3 Cor Art from R Int Mammary, Perc Endo Approach      | 02134Z9 | Bypass 4+ Cor Art from L Int Mammary, Perc Endo Approach     |
| 02124Z9 | Bypass 3 Cor Art from L Int Mammary, Perc Endo Approach      | 02134ZC | Bypass 4+ Cor Art from Thor Art, Perc Endo Approach          |
| 02124ZC | Bypass 3 Cor Art from Thor Art, Perc Endo Approach           | 02134ZF | Bypass 4+ Cor Art from Abd Art, Perc Endo Approach           |
| 02124ZF | Bypass 3 Cor Art from Abd Art, Perc Endo Approach            |         |                                                              |
| 0213083 | Bypass 4+ Cor Art from Cor Art w Zooplastic, Open            |         |                                                              |
| 0213088 | Bypass 4+ Cor Art from R Int Mammary w Zooplastic, Open      |         |                                                              |
| 0213089 | Bypass 4+ Cor Art from L Int Mammary w Zooplastic, Open      |         |                                                              |
| 021308C | Bypass 4+ Cor Art from Thor Art w Zooplastic, Open           |         |                                                              |
| 021308F | Bypass 4+ Cor Art from Abd Art w Zooplastic, Open            |         |                                                              |
| 021308W | Bypass 4+ Cor Art from Aorta with Zooplastic, Open Approach  |         |                                                              |
| 0213093 | Bypass 4+ Cor Art from Cor Art with Autol Vn, Open Approach  |         |                                                              |
| 0213098 | Bypass 4+ Cor Art from R Int Mammary w Autol Vn, Open        |         |                                                              |
| 0213099 | Bypass 4+ Cor Art from L Int Mammary w Autol Vn, Open        |         |                                                              |
| 021309C | Bypass 4+ Cor Art from Thor Art with Autol Vn, Open Approach |         |                                                              |
| 021309F | Bypass 4+ Cor Art from Abd Art with Autol Vn, Open Approach  |         |                                                              |
| 021309W | Bypass 4+ Cor Art from Aorta with Autol Vn, Open Approach    |         |                                                              |
| 02130A3 | Bypass 4+ Cor Art from Cor Art with Autol Art, Open Approach |         |                                                              |
| 02130A8 | Bypass 4+ Cor Art from R Int Mammary w Autol Art, Open       |         |                                                              |
| 02130A9 | Bypass 4+ Cor Art from L Int Mammary w Autol Art, Open       |         |                                                              |

**HIP FRACTURE (HIF)**

Urgent episodes (Circ. Admission = Urgent) with main diagnosis of hip fracture that have been operated.

**Femur fracture diagnosis codes**

|          |                                                              |
|----------|--------------------------------------------------------------|
| S72.001A | Fracture of unsp part of neck of right femur, init           |
| S72.001B | Fx unsp part of neck of r femur, init for opn fx type 1/2    |
| S72.001C | Fx unsp part of neck of r femur, init for opn fx type 3A/B/C |
| S72.002A | Fracture of unsp part of neck of left femur, init            |
| S72.002B | Fx unsp part of neck of left femur, init for opn fx type 1/2 |
| S72.002C | Fx unsp part of neck of l femur, init for opn fx type 3A/B/C |
| S72.009A | Fracture of unsp part of neck of unsp femur, init            |
| S72.009B | Fx unsp part of neck of unsp femur, init for opn fx type 1/2 |

|          |                                                              |          |                                                              |
|----------|--------------------------------------------------------------|----------|--------------------------------------------------------------|
| S72.009C | Fx unsp part of nk of unsp femr, init for opn fx type 3A/B/C | S72.061C | Displ artic fx head of r femur, init for opn fx type 3A/B/C  |
| S72.011A | Unsp intracapsular fracture of right femur, init for clos fx | S72.062A | Displaced articular fracture of head of left femur, init     |
| S72.011B | Unsp intracap fx right femur, init for opn fx type I/2       | S72.062B | Displaced artic fx head of l femur, init for opn fx type I/2 |
| S72.011C | Unsp intracap fx right femur, init for opn fx type 3A/B/C    | S72.062C | Displ artic fx head of l femur, init for opn fx type 3A/B/C  |
| S72.012A | Unsp intracapsular fracture of left femur, init for clos fx  | S72.063A | Displaced articular fracture of head of unsp femur, init     |
| S72.012B | Unsp intracap fx left femur, init for opn fx type I/2        | S72.063B | Displ artic fx head of unsp femur, init for opn fx type I/2  |
| S72.012C | Unsp intracap fx left femur, init for opn fx type 3A/B/C     | S72.063C | Displ artic fx head of unsp femr, 7thC                       |
| S72.019A | Unsp intracapsular fracture of unsp femur, init for clos fx  | S72.064A | Nondisplaced articular fracture of head of right femur, init |
| S72.019B | Unsp intracap fx unsp femur, init for opn fx type I/2        | S72.064B | Nondisp artic fx head of r femur, init for opn fx type I/2   |
| S72.019C | Unsp intracap fx unsp femur, init for opn fx type 3A/B/C     | S72.064C | Nondisp artic fx head of r femr, init for opn fx type 3A/B/C |
| S72.021A | Disp fx of epiphysis (separation) (upper) of r femur, init   | S72.065A | Nondisplaced articular fracture of head of left femur, init  |
| S72.021B | Disp fx of epiphy (separation) (upper) of r femr, 7thB       | S72.065B | Nondisp artic fx head of l femur, init for opn fx type I/2   |
| S72.021C | Disp fx of epiphy (separation) (upper) of r femr, 7thC       | S72.065C | Nondisp artic fx head of l femr, init for opn fx type 3A/B/C |
| S72.022A | Disp fx of epiphysis (separation) (upper) of l femur, init   | S72.066A | Nondisplaced articular fracture of head of unsp femur, init  |
| S72.022B | Disp fx of epiphy (separation) (upper) of l femr, 7thB       | S72.066B | Nondisp artic fx head of unsp femr, init for opn fx type I/2 |
| S72.022C | Disp fx of epiphy (separation) (upper) of l femr, 7thC       | S72.066C | Nondisp artic fx head of unsp femr, 7thC                     |
| S72.023A | Disp fx of epiphy (separation) (upper) of unsp femur, init   | S72.091A | Oth fracture of head and neck of right femur, init           |
| S72.023B | Disp fx of epiphy (separation) (upper) of unsp femr, 7thB    | S72.091B | Oth fx head/neck of right femur, init for opn fx type I/2    |
| S72.023C | Disp fx of epiphy (separation) (upper) of unsp femr, 7thC    | S72.091C | Oth fx head/neck of right femur, init for opn fx type 3A/B/C |
| S72.024A | Nondisp fx of epiphy (separation) (upper) of r femur, init   | S72.092A | Oth fracture of head and neck of left femur, init            |
| S72.024B | Nondisp fx of epiphy (separation) (upper) of r femr, 7thB    | S72.092B | Oth fx head/neck of left femur, init for opn fx type I/2     |
| S72.024C | Nondisp fx of epiphy (separation) (upper) of r femr, 7thC    | S72.092C | Oth fx head/neck of left femur, init for opn fx type 3A/B/C  |
| S72.025A | Nondisp fx of epiphy (separation) (upper) of l femur, init   | S72.099A | Oth fracture of head and neck of unsp femur, init            |
| S72.025B | Nondisp fx of epiphy (separation) (upper) of l femr, 7thB    | S72.099B | Oth fx head/neck of unsp femur, init for opn fx type I/2     |
| S72.025C | Nondisp fx of epiphy (separation) (upper) of l femr, 7thC    | S72.099C | Oth fx head/neck of unsp femur, init for opn fx type 3A/B/C  |
| S72.026A | Nondisp fx of epiphy (separation) (upper) of unsp femr, init | S72.101A | Unsp trochanteric fracture of right femur, init for clos fx  |
| S72.026B | Nondisp fx of epiphy (separation) (upper) of unsp femr, 7thB | S72.101B | Unsp trochan fx right femur, init for opn fx type I/2        |
| S72.026C | Nondisp fx of epiphy (separation) (upper) of unsp femr, 7thC | S72.101C | Unsp trochan fx right femur, init for opn fx type 3A/B/C     |
| S72.031A | Displaced midcervical fracture of right femur, init          | S72.102A | Unsp trochanteric fracture of left femur, init for clos fx   |
| S72.031B | Displaced midcervical fx r femur, init for opn fx type I/2   | S72.102B | Unsp trochan fx left femur, init for opn fx type I/2         |
| S72.031C | Displ midcervical fx r femur, init for opn fx type 3A/B/C    | S72.102C | Unsp trochan fx left femur, init for opn fx type 3A/B/C      |
| S72.032A | Displaced midcervical fracture of left femur, init           | S72.109A | Unsp trochanteric fracture of unsp femur, init for clos fx   |
| S72.032B | Displaced midcervical fx l femur, init for opn fx type I/2   | S72.109B | Unsp trochan fx unsp femur, init for opn fx type I/2         |
| S72.032C | Displ midcervical fx l femur, init for opn fx type 3A/B/C    | S72.109C | Unsp trochan fx unsp femur, init for opn fx type 3A/B/C      |
| S72.033A | Displaced midcervical fracture of unsp femur, init           | S72.111A | Disp fx of greater trochanter of right femur, init           |
| S72.033B | Displ midcervical fx unsp femur, init for opn fx type I/2    | S72.111B | Disp fx of greater trochanter of r femr, 7thB                |
| S72.033C | Displ midcervical fx unsp femur, init for opn fx type 3A/B/C | S72.111C | Disp fx of greater trochanter of r femr, 7thC                |
| S72.034A | Nondisplaced midcervical fracture of right femur, init       | S72.112A | Disp fx of greater trochanter of left femur, init            |
| S72.034B | Nondisp midcervical fx right femur, init for opn fx type I/2 | S72.112B | Disp fx of greater trochanter of l femr, 7thB                |
| S72.034C | Nondisp midcervical fx r femur, init for opn fx type 3A/B/C  | S72.112C | Disp fx of greater trochanter of l femr, 7thC                |
| S72.035A | Nondisplaced midcervical fracture of left femur, init        | S72.113A | Disp fx of greater trochanter of unsp femur, init            |
| S72.035B | Nondisp midcervical fx left femur, init for opn fx type I/2  | S72.113B | Disp fx of greater trochanter of unsp femr, 7thB             |
| S72.035C | Nondisp midcervical fx l femur, init for opn fx type 3A/B/C  | S72.113C | Disp fx of greater trochanter of unsp femr, 7thC             |
| S72.036A | Nondisplaced midcervical fracture of unsp femur, init        | S72.114A | Nondisp fx of greater trochanter of right femur, init        |
| S72.036B | Nondisp midcervical fx unsp femur, init for opn fx type I/2  | S72.114B | Nondisp fx of greater trochanter of r femr, 7thB             |
| S72.036C | Nondisp midcervical fx unsp femr, 7thC                       | S72.114C | Nondisp fx of greater trochanter of r femr, 7thC             |
| S72.041A | Disp fx of base of neck of right femur, init for clos fx     | S72.115A | Nondisp fx of greater trochanter of left femur, init         |
| S72.041B | Disp fx of base of neck of r femur, init for opn fx type I/2 | S72.115B | Nondisp fx of greater trochanter of l femr, 7thB             |
| S72.041C | Disp fx of base of nk of r femr, init for opn fx type 3A/B/C | S72.115C | Nondisp fx of greater trochanter of l femr, 7thC             |
| S72.042A | Disp fx of base of neck of left femur, init for clos fx      | S72.116A | Nondisp fx of greater trochanter of unsp femur, init         |
| S72.042B | Disp fx of base of neck of l femur, init for opn fx type I/2 | S72.116B | Nondisp fx of greater trochanter of unsp femr, 7thB          |
| S72.042C | Disp fx of base of nk of l femr, init for opn fx type 3A/B/C | S72.116C | Nondisp fx of greater trochanter of unsp femr, 7thC          |
| S72.043A | Disp fx of base of neck of unsp femur, init for clos fx      | S72.121A | Disp fx of lesser trochanter of right femur, init            |
| S72.043B | Disp fx of base of nk of unsp femr, init for opn fx type I/2 | S72.121B | Disp fx of less trochanter of r femr, 7thB                   |
| S72.043C | Disp fx of base of nk of unsp femr, 7thC                     | S72.121C | Disp fx of less trochanter of r femr, 7thC                   |
| S72.044A | Nondisp fx of base of neck of right femur, init for clos fx  | S72.122A | Disp fx of lesser trochanter of left femur, init for clos fx |
| S72.044B | Nondisp fx of base of nk of r femr, init for opn fx type I/2 | S72.122B | Disp fx of less trochanter of l femr, 7thB                   |
| S72.044C | Nondisp fx of base of nk of r femr, 7thC                     | S72.122C | Disp fx of less trochanter of l femr, 7thC                   |
| S72.045A | Nondisp fx of base of neck of left femur, init for clos fx   | S72.123A | Disp fx of lesser trochanter of unsp femur, init for clos fx |
| S72.045B | Nondisp fx of base of nk of l femr, init for opn fx type I/2 | S72.123B | Disp fx of less trochanter of unsp femr, 7thB                |
| S72.045C | Nondisp fx of base of nk of l femr, 7thC                     | S72.123C | Disp fx of less trochanter of unsp femr, 7thC                |
| S72.046A | Nondisp fx of base of neck of unsp femur, init for clos fx   | S72.124A | Nondisp fx of lesser trochanter of right femur, init         |
| S72.046B | Nondisp fx of base of nk of unsp femr, 7thB                  | S72.124B | Nondisp fx of less trochanter of r femr, 7thB                |
| S72.046C | Nondisp fx of base of nk of unsp femr, 7thC                  | S72.124C | Nondisp fx of less trochanter of r femr, 7thC                |
| S72.051A | Unsp fracture of head of right femur, init for clos fx       | S72.125A | Nondisp fx of lesser trochanter of left femur, init          |
| S72.051B | Unsp fx head of right femur, init for opn fx type I/2        | S72.125B | Nondisp fx of less trochanter of l femr, 7thB                |
| S72.051C | Unsp fx head of right femur, init for opn fx type 3A/B/C     | S72.125C | Nondisp fx of less trochanter of l femr, 7thC                |
| S72.052A | Unsp fracture of head of left femur, init for clos fx        | S72.126A | Nondisp fx of lesser trochanter of unsp femur, init          |
| S72.052B | Unsp fx head of left femur, init for opn fx type I/2         | S72.126B | Nondisp fx of less trochanter of unsp femr, 7thB             |
| S72.052C | Unsp fx head of left femur, init for opn fx type 3A/B/C      | S72.126C | Nondisp fx of less trochanter of unsp femr, 7thC             |
| S72.059A | Unsp fracture of head of unsp femur, init for clos fx        | S72.131A | Displaced apophyseal fracture of right femur, init           |
| S72.059B | Unsp fx head of unsp femur, init for opn fx type I/2         | S72.131B | Displaced apophyseal fx r femur, init for opn fx type I/2    |
| S72.059C | Unsp fx head of unsp femur, init for opn fx type 3A/B/C      | S72.131C | Displaced apophyseal fx r femur, init for opn fx type 3A/B/C |
| S72.061A | Displaced articular fracture of head of right femur, init    | S72.132A | Displaced apophyseal fracture of left femur, init            |
| S72.061B | Displaced artic fx head of r femur, init for opn fx type I/2 | S72.132B | Displaced apophyseal fx left femur, init for opn fx type I/2 |

S72.132C Displaced apophyseal fx l femur, init for opn fx type 3A/B/C  
 S72.133A Displaced apophyseal fracture of unsp femur, init  
 S72.133B Displaced apophyseal fx unsp femur, init for opn fx type I/2  
 S72.133C Displ apophyseal fx unsp femur, init for opn fx type 3A/B/C  
 S72.134A Nondisplaced apophyseal fracture of right femur, init  
 S72.134B Nondisp apophyseal fx right femur, init for opn fx type I/2  
 S72.134C Nondisp apophyseal fx r femur, init for opn fx type 3A/B/C  
 S72.135A Nondisplaced apophyseal fracture of left femur, init  
 S72.135B Nondisp apophyseal fx left femur, init for opn fx type I/2  
 S72.135C Nondisp apophyseal fx l femur, init for opn fx type 3A/B/C  
 S72.136A Nondisplaced apophyseal fracture of unsp femur, init  
 S72.136B Nondisp apophyseal fx unsp femur, init for opn fx type I/2  
 S72.136C Nondisp apophyseal fx unsp femr, init for opn fx type 3A/B/C  
 S72.141A Displaced intertrochanteric fracture of right femur, init  
 S72.141B Displaced intertroch fx r femur, init for opn fx type I/2  
 S72.141C Displaced intertroch fx l femur, init for opn fx type 3A/B/C  
 S72.142A Displaced intertrochanteric fracture of left femur, init  
 S72.142B Displaced intertroch fx left femur, init for opn fx type I/2  
 S72.142C Displaced intertroch fx l femur, init for opn fx type 3A/B/C  
 S72.143A Displaced intertrochanteric fracture of unsp femur, init  
 S72.143B Displaced intertroch fx unsp femur, init for opn fx type I/2  
 S72.143C Displ intertroch fx unsp femur, init for opn fx type 3A/B/C  
 S72.144A Nondisplaced intertrochanteric fracture of right femur, init  
 S72.144B Nondisp intertroch fx right femur, init for opn fx type I/2  
 S72.144C Nondisp intertroch fx r femur, init for opn fx type 3A/B/C  
 S72.145A Nondisplaced intertrochanteric fracture of left femur, init  
 S72.145B Nondisp intertroch fx left femur, init for opn fx type I/2  
 S72.145C Nondisp intertroch fx l femur, init for opn fx type 3A/B/C  
 S72.146A Nondisplaced intertrochanteric fracture of unsp femur, init  
 S72.146B Nondisp intertroch fx unsp femur, init for opn fx type I/2  
 S72.146C Nondisp intertroch fx unsp femr, init for opn fx type 3A/B/C  
 S72.21XA Displaced subtrochanteric fracture of right femur, init  
 S72.21XB Displaced subtrochnt fx r femur, init for opn fx type I/2  
 S72.21XC Displaced subtrochnt fx r femur, init for opn fx type 3A/B/C  
 S72.22XA Displaced subtrochanteric fracture of left femur, init  
 S72.22XB Displaced subtrochnt fx left femur, init for opn fx type I/2  
 S72.22XC Displaced subtrochnt fx l femur, init for opn fx type 3A/B/C  
 S72.23XA Displaced subtrochanteric fracture of unsp femur, init  
 S72.23XB Displaced subtrochnt fx unsp femur, init for opn fx type I/2  
 S72.23XC Displ subtrochnt fx unsp femur, init for opn fx type 3A/B/C  
 S72.24XA Nondisplaced subtrochanteric fracture of right femur, init  
 S72.24XB Nondisp subtrochnt fx right femur, init for opn fx type I/2  
 S72.24XC Nondisp subtrochnt fx r femur, init for opn fx type 3A/B/C  
 S72.25XA Nondisplaced subtrochanteric fracture of left femur, init  
 S72.25XB Nondisp subtrochnt fx left femur, init for opn fx type I/2  
 S72.25XC Nondisp subtrochnt fx l femur, init for opn fx type 3A/B/C  
 S72.26XA Nondisplaced subtrochanteric fracture of unsp femur, init  
 S72.26XB Nondisp subtrochnt fx unsp femur, init for opn fx type I/2  
 S72.26XC Nondisp subtrochnt fx unsp femr, init for opn fx type 3A/B/C

**GASTROINTESTINAL BLEEDING (GIB)**

Episodes with some diagnosis of gastrointestinal bleeding

**Gastrointestinal bleeding diagnostic codes**

I85.01 Esophageal varices with bleeding  
 I85.11 Secondary esophageal varices with bleeding  
 K22.11 Ulcer of esophagus with bleeding  
 K25.0 Acute gastric ulcer with hemorrhage  
 K25.2 Acute gastric ulcer with both hemorrhage and perforation  
 K25.4 Chronic or unspecified gastric ulcer with hemorrhage  
 K25.6 Chronic or unsp gastric ulcer w both hemorrhage and perf  
 K26.0 Acute duodenal ulcer with hemorrhage  
 K26.2 Acute duodenal ulcer with both hemorrhage and perforation  
 K26.4 Chronic or unspecified duodenal ulcer with hemorrhage  
 K26.6 Chronic or unsp duodenal ulcer w both hemorrhage and perf  
 K27.0 Acute peptic ulcer, site unspecified, with hemorrhage  
 K27.2 Acute peptic ulcer, site unsp, w both hemorrhage and perf  
 K27.4 Chronic or unsp peptic ulcer, site unsp, with hemorrhage  
 K27.6 Chr or unsp peptic ulcer, site unsp, w both hemor and perf  
 K28.0 Acute gastrojejunal ulcer with hemorrhage  
 K28.2 Acute gastrojejunal ulcer w both hemorrhage and perforation  
 K28.4 Chronic or unspecified gastrojejunal ulcer with hemorrhage  
 K28.6 Chronic or unsp gastrojejunal ulcer w both hemor and perf  
 K29.01 Acute gastritis with bleeding  
 K29.21 Alcoholic gastritis with bleeding  
 K29.31 Chronic superficial gastritis with bleeding  
 K29.41 Chronic atrophic gastritis with bleeding  
 K29.51 Unspecified chronic gastritis with bleeding  
 K29.61 Other gastritis with bleeding  
 K29.71 Gastritis, unspecified, with bleeding  
 K29.81 Duodenitis with bleeding  
 K29.91 Gastroduodenitis, unspecified, with bleeding  
 K92.0 Hematemesis  
 K92.1 Melena  
 K92.2 Gastrointestinal hemorrhage, unspecified

Example of the hospital scorecard - Process section MAP<sub>BM</sub>

|                                                 | Pillar I. Optimise red cell mass                                 |                                                                       |                                                               |                                                         |                                             | Pillar II. Minimize blood loss and bleeding |                                                              |                               |                                           | Pillar III. Harness and optimise physiological reserve of anaemia |       |      |       |      |       |      |       |      |     |      |
|-------------------------------------------------|------------------------------------------------------------------|-----------------------------------------------------------------------|---------------------------------------------------------------|---------------------------------------------------------|---------------------------------------------|---------------------------------------------|--------------------------------------------------------------|-------------------------------|-------------------------------------------|-------------------------------------------------------------------|-------|------|-------|------|-------|------|-------|------|-----|------|
|                                                 | % of patients with an Hb determination 21-90 days before surgery | % of patients with a Ferritin determination 21-90 days before surgery | % of patients treated preoperatively 7-90 days before surgery | % of patients treated with IV iron during hospital stay | % of patients with preoperative transfusion | % of patients under spinal anaesthesia      | % of patients treated with antifibrinolytics perioperatively | Hb level prior to transfusion | % of patients transfused with Hb > 8 g/dl | % of single-unit transfused patients                              |       |      |       |      |       |      |       |      |     |      |
| <b>Clinical Procedure</b>                       |                                                                  |                                                                       |                                                               |                                                         |                                             |                                             |                                                              |                               |                                           |                                                                   |       |      |       |      |       |      |       |      |     |      |
|                                                 | Hosp.                                                            | Norm                                                                  | Hosp.                                                         | Norm                                                    | Hosp.                                       | Norm                                        | Hosp.                                                        | Norm                          | Hosp.                                     | Norm                                                              | Hosp. | Norm | Hosp. | Norm | Hosp. | Norm | Hosp. | Norm |     |      |
| Total hip replacement (N=240)                   | 48%                                                              | 51%                                                                   | 12%                                                           | 42%                                                     | 13%                                         | 16%                                         | 6%                                                           | 13%                           | 1%                                        | 1%                                                                | 65%   | 75%  | 100%  | 52%  | 8,5   | 8,4  | 63%   | 61%  | 42% | 33%  |
|                                                 | ▼                                                                | -6%                                                                   | ▼                                                             | -72%                                                    | ▼                                           | -15%                                        | ▼                                                            | -57%                          | ►                                         | -1%                                                               | ▼     | -13% | ►     | 94%  | ►     | 2%   | ►     | 2%   | ►   | 29%  |
| Total knee replacement (N=418)                  | 44%                                                              | 48%                                                                   | 21%                                                           | 39%                                                     | 14%                                         | 17%                                         | 4%                                                           | 12%                           | 1%                                        | 0%                                                                | 37%   | 79%  | 99%   | 54%  | 8,8   | 8,5  | 76%   | 63%  | 58% | 34%  |
|                                                 | ▼                                                                | -8%                                                                   | ▼                                                             | -47%                                                    | ▼                                           | -21%                                        | ▼                                                            | -68%                          | ►                                         | 114%                                                              | ▼     | 5%   | ►     | 83%  | ►     | 4%   | ►     | 21%  | ►   | 69%  |
| Colorectal cancer resection open (N=29)         | 83%                                                              | 61%                                                                   | 17%                                                           | 39%                                                     | 0%                                          | 23%                                         | 10%                                                          | 13%                           | 5%                                        | 4%                                                                |       |      |       |      | 8,3   | 8,6  | 36%   | 64%  | 64% | 50%  |
|                                                 | ►                                                                | 37%                                                                   | ▼                                                             | -57%                                                    | ▼                                           | -100%                                       | ▼                                                            | -20%                          | ►                                         | 7%                                                                |       |      |       |      | ►     | -3%  | ▼     | -43% | ►   | 29%  |
| Colorectal cancer resection laparoscopic (N=78) | 74%                                                              | 59%                                                                   | 17%                                                           | 46%                                                     | 0%                                          | 21%                                         | 1%                                                           | 12%                           | 1%                                        | 3%                                                                |       |      |       |      | 8,2   | 8,5  | 67%   | 67%  | 50% | 47%  |
|                                                 | ►                                                                | 25%                                                                   | ▼                                                             | -62%                                                    | ▼                                           | -100%                                       | ▼                                                            | -8%                           | ►                                         | 61%                                                               |       |      |       |      | ►     | -4%  | ►     | -1%  | ►   | 6%   |
| Cardiac valve replacement (N=215)               | 53%                                                              | 44%                                                                   | 20%                                                           | 41%                                                     | 0%                                          | 5%                                          | 11%                                                          | 6%                            | 2%                                        | 10%                                                               |       |      | 85%   | 82%  | 8,7   | 9,2  | 58%   | 72%  | 67% | 53%  |
|                                                 | ►                                                                | 23%                                                                   | ▼                                                             | -52%                                                    | ▼                                           | -10%                                        | ►                                                            | 79%                           | ►                                         | 122%                                                              |       |      | ►     | 4%   | ▼     | -6%  | ▼     | -19% | ►   | 27%  |
| Hip Fracture (N=360)                            |                                                                  |                                                                       |                                                               |                                                         |                                             |                                             | 1%                                                           | 25%                           |                                           |                                                                   | 70%   | 73%  | 5%    | 12%  | 8,0   | 8,2  | 59%   | 60%  | 30% | 43%  |
|                                                 |                                                                  |                                                                       |                                                               |                                                         |                                             |                                             | ▼                                                            | -92%                          |                                           |                                                                   | ►     | -4%  | ▼     | -55% | ►     | -2%  | ►     | -2%  | ▼   | -32% |
| Gastrointestinal bleeding (N=437)               |                                                                  |                                                                       |                                                               |                                                         |                                             |                                             | 5%                                                           | 32%                           |                                           |                                                                   |       |      |       |      | 7,7   | 7,4  | 34%   | 35%  | 46% | 40%  |
|                                                 |                                                                  |                                                                       |                                                               |                                                         |                                             |                                             | ▼                                                            | -86%                          |                                           |                                                                   |       |      |       |      | ►     | 5%   | ►     | -1%  | ►   | 16%  |

Example of the hospital scorecard - Outcomes section MAP<sub>BM</sub>

|                                                 | Intermediate Outcomes |          |                   |          |                                              |          | Hard Outcomes  |          |                       |          |                           |          |               |          |   |      |
|-------------------------------------------------|-----------------------|----------|-------------------|----------|----------------------------------------------|----------|----------------|----------|-----------------------|----------|---------------------------|----------|---------------|----------|---|------|
|                                                 | Transfusion Rate      |          | Transfusion Index |          | Total Transfusion Index (per 1.000 patients) |          | Length of Stay |          | In-Hospital Mortality |          | In-Hospital Complications |          | Re-admissions |          |   |      |
|                                                 | Observed              | Expected | Observed          | Expected | Observed                                     | Expected | Observed       | Expected | Observed              | Expected | Observed                  | Expected | Observed      | Expected |   |      |
| <b>Overall (all clinical procedures)</b>        |                       |          |                   |          |                                              |          |                |          |                       |          |                           |          |               |          |   |      |
| Global                                          | 38,0%                 | 35,5%    | 4,38              | 3,52     | 1663,56                                      | 1247,65  | 14,68          | 9,54     | 7,1%                  | 4,8%     | 10,5%                     | 7,4%     | 4,7%          | 4,4%     |   |      |
|                                                 | Indice                | ►        | 1,07              | ►        | 1,24                                         | ►        | 1,33           | Indice   | ►                     | 1,54     | ►                         | 1,48     | ►             | 1,42     | ► | 1,06 |
| <b>Clinical Procedure</b>                       |                       |          |                   |          |                                              |          |                |          |                       |          |                           |          |               |          |   |      |
| Total hip replacement (N=240)                   | 12,1%                 | 15,8%    | 4,71              | 2,49     | 571,43                                       | 381,05   | 9,36           | 6,27     | 0,0%                  | 0,1%     | 4,8%                      | 2,5%     | 0,9%          | 1,7%     |   |      |
|                                                 | Indice                | ▼        | 0,77              | ►        | 1,89                                         | ►        | 1,50           | Indice   | ►                     | 1,49     | ▼                         | 0,00     | ►             | 1,89     | ▼ | 0,54 |
| Total knee replacement (N=418)                  | 5,8%                  | 9,7%     | 3,05              | 2,11     | 175,34                                       | 207,10   | 9,10           | 5,80     | 0,3%                  | 0,0%     | 4,4%                      | 2,0%     | 0,6%          | 1,2%     |   |      |
|                                                 | Indice                | ▼        | 0,59              | ►        | 1,45                                         | ▼        | 0,95           | Indice   | ►                     | 1,62     | ►                         | 6,99     | ►             | 2,24     | ▼ | 0,50 |
| Colorectal cancer resection open (N=29)         | 37,9%                 | 20,3%    | 2,64              | 2,66     | 1.000,00                                     | 500,25   | 17,38          | 12,82    | 0,0%                  | 2,4%     | 25,0%                     | 20,2%    | 8,0%          | 8,3%     |   |      |
|                                                 | Indice                | ►        | 1,87              | ►        | 0,99                                         | ►        | 1,72           | Indice   | ►                     | 1,36     | ▼                         | 0,00     | ►             | 1,24     | ► | 0,96 |
| Colorectal cancer resection laparoscopic (N=78) | 9,0%                  | 12,0%    | 1,71              | 2,5      | 53,8                                         | 317,51   | 7,62           | 8,81     | 1,3%                  | 0,9%     | 12,8%                     | 13,5%    | 9,7%          | 4,5%     |   |      |
|                                                 | Indice                | ▼        | 0,74              | ▼        | 0,75                                         | ▼        | 0,48           | Indice   | ▼                     | 0,86     | ►                         | 1,42     | ▼             | 0,95     | ► | 2,16 |
| Cardiac valve replacement (N=215)               | 64,2%                 | 52,9%    | 5,60              | 4,19     | 3595,35                                      | 2269,68  | 19,04          | 14,06    | 4,2%                  | 3,6%     | 21,1%                     | 17,6%    | 6,5%          | 5,0%     |   |      |
|                                                 | Indice                | ►        | 1,21              | ►        | 1,34                                         | ►        | 1,58           | Indice   | ►                     | 1,35     | ►                         | 1,16     | ►             | 1,20     | ► | 1,30 |
| Hip Fracture (N=360)                            | 56,1%                 | 47,9%    | 3,04              | 2,54     | 1.705,56                                     | 1.222,07 | 18,23          | 10,98    | 6,9%                  | 4,3%     | 8,8%                      | 7,3%     | 4,6%          | 4,5%     |   |      |
|                                                 | Indice                | ►        | 1,17              | ►        | 1,19                                         | ►        | 1,40           | Indice   | ►                     | 1,66     | ►                         | 1,60     | ►             | 1,21     | ► | 1,02 |
| Gastrointestinal bleeding (N=437)               | 56,1%                 | 53,9%    | 5,02              | 4,25     | 2.812,36                                     | 2.303,36 | 17,90          | 10,88    | 19,7%                 | 13,2%    | 14,0%                     | 8,2%     | 9,8%          | 9,5%     |   |      |
|                                                 | Indice                | ►        | 1,04              | ►        | 1,18                                         | ►        | 1,22           | Indice   | ►                     | 1,65     | ►                         | 1,50     | ►             | 1,70     | ► | 1,03 |

Figure S1 - Hospital Scorecard Executive Report

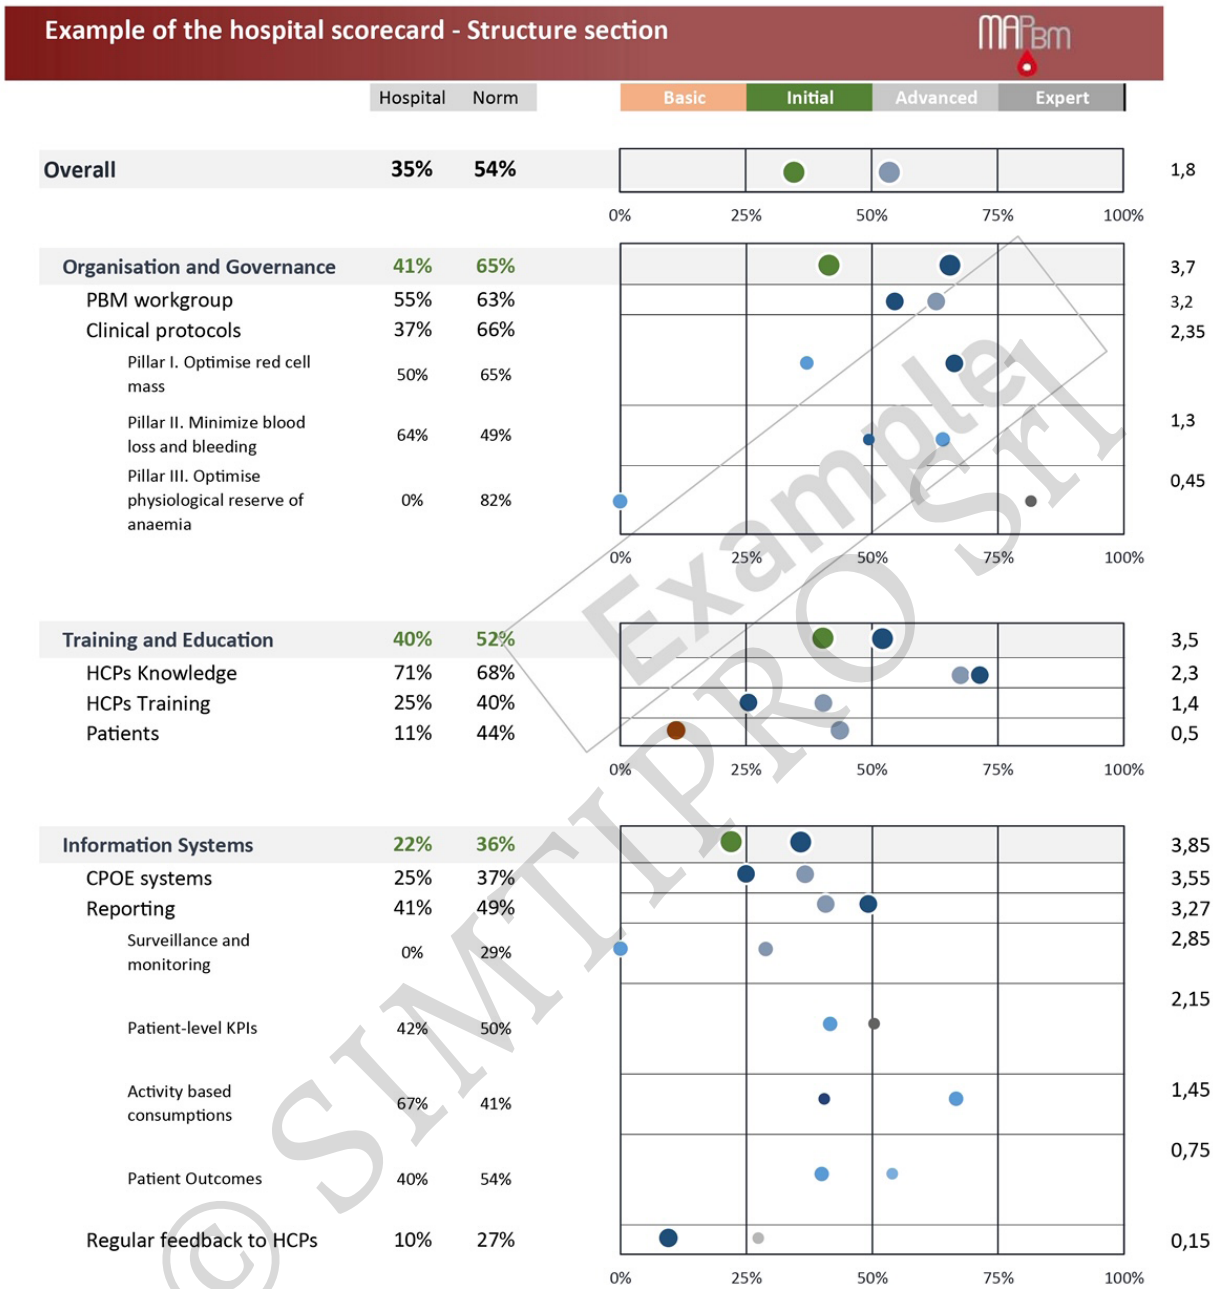

Figure S1 - Hospital Scorecard Executive Report
